# Supplementary material for: Experimenting with reproducibility: a case study of robustness in bioinformatics
Source: PubMed Central journal article supplement (PMC6054242; doi:10.1093/gigascience/giy077), 2018-06-28

|                                                      |                                                                                                                                                                                                                                                                                                                                                                                                                                                                                                                                                                                                                                                                                                                                                                                                                                                                                                                                                                                                                                                                                                                                                                                                                                                                                                                                                                                                                                                                                                                                                                                                                                                                                                                          |                |
|------------------------------------------------------|--------------------------------------------------------------------------------------------------------------------------------------------------------------------------------------------------------------------------------------------------------------------------------------------------------------------------------------------------------------------------------------------------------------------------------------------------------------------------------------------------------------------------------------------------------------------------------------------------------------------------------------------------------------------------------------------------------------------------------------------------------------------------------------------------------------------------------------------------------------------------------------------------------------------------------------------------------------------------------------------------------------------------------------------------------------------------------------------------------------------------------------------------------------------------------------------------------------------------------------------------------------------------------------------------------------------------------------------------------------------------------------------------------------------------------------------------------------------------------------------------------------------------------------------------------------------------------------------------------------------------------------------------------------------------------------------------------------------------|----------------|
| <b>Manuscript Number:</b>                            | GIGA-D-17-00317R2                                                                                                                                                                                                                                                                                                                                                                                                                                                                                                                                                                                                                                                                                                                                                                                                                                                                                                                                                                                                                                                                                                                                                                                                                                                                                                                                                                                                                                                                                                                                                                                                                                                                                                        |                |
| <b>Full Title:</b>                                   | Experimenting with Reproducibility: a case study of Robustness in Bioinformatics                                                                                                                                                                                                                                                                                                                                                                                                                                                                                                                                                                                                                                                                                                                                                                                                                                                                                                                                                                                                                                                                                                                                                                                                                                                                                                                                                                                                                                                                                                                                                                                                                                         |                |
| <b>Article Type:</b>                                 | Review                                                                                                                                                                                                                                                                                                                                                                                                                                                                                                                                                                                                                                                                                                                                                                                                                                                                                                                                                                                                                                                                                                                                                                                                                                                                                                                                                                                                                                                                                                                                                                                                                                                                                                                   |                |
| <b>Funding Information:</b>                          | Institut Pasteur (FR)                                                                                                                                                                                                                                                                                                                                                                                                                                                                                                                                                                                                                                                                                                                                                                                                                                                                                                                                                                                                                                                                                                                                                                                                                                                                                                                                                                                                                                                                                                                                                                                                                                                                                                    | Not applicable |
|                                                      | H2020 Health                                                                                                                                                                                                                                                                                                                                                                                                                                                                                                                                                                                                                                                                                                                                                                                                                                                                                                                                                                                                                                                                                                                                                                                                                                                                                                                                                                                                                                                                                                                                                                                                                                                                                                             | Not applicable |
|                                                      | Institut National des Sciences de l'Univers, Centre National de la Recherche Scientifique (FR)                                                                                                                                                                                                                                                                                                                                                                                                                                                                                                                                                                                                                                                                                                                                                                                                                                                                                                                                                                                                                                                                                                                                                                                                                                                                                                                                                                                                                                                                                                                                                                                                                           | Not applicable |
|                                                      | Université Paris Diderot (FR)                                                                                                                                                                                                                                                                                                                                                                                                                                                                                                                                                                                                                                                                                                                                                                                                                                                                                                                                                                                                                                                                                                                                                                                                                                                                                                                                                                                                                                                                                                                                                                                                                                                                                            | Not applicable |
|                                                      | Conny-Maeva Charitable Foundation                                                                                                                                                                                                                                                                                                                                                                                                                                                                                                                                                                                                                                                                                                                                                                                                                                                                                                                                                                                                                                                                                                                                                                                                                                                                                                                                                                                                                                                                                                                                                                                                                                                                                        | Not applicable |
|                                                      | Cognacq-Jay Foundation                                                                                                                                                                                                                                                                                                                                                                                                                                                                                                                                                                                                                                                                                                                                                                                                                                                                                                                                                                                                                                                                                                                                                                                                                                                                                                                                                                                                                                                                                                                                                                                                                                                                                                   | Not applicable |
|                                                      | Orange                                                                                                                                                                                                                                                                                                                                                                                                                                                                                                                                                                                                                                                                                                                                                                                                                                                                                                                                                                                                                                                                                                                                                                                                                                                                                                                                                                                                                                                                                                                                                                                                                                                                                                                   | Not applicable |
|                                                      | Fondation pour la Recherche Médicale                                                                                                                                                                                                                                                                                                                                                                                                                                                                                                                                                                                                                                                                                                                                                                                                                                                                                                                                                                                                                                                                                                                                                                                                                                                                                                                                                                                                                                                                                                                                                                                                                                                                                     | Not applicable |
|                                                      | GenMed Labex                                                                                                                                                                                                                                                                                                                                                                                                                                                                                                                                                                                                                                                                                                                                                                                                                                                                                                                                                                                                                                                                                                                                                                                                                                                                                                                                                                                                                                                                                                                                                                                                                                                                                                             | Not applicable |
|                                                      | BioPsy Labex                                                                                                                                                                                                                                                                                                                                                                                                                                                                                                                                                                                                                                                                                                                                                                                                                                                                                                                                                                                                                                                                                                                                                                                                                                                                                                                                                                                                                                                                                                                                                                                                                                                                                                             | Not applicable |
| <b>Abstract:</b>                                     | <p>Reproducibility has been shown to be limited in many scientific fields. This question is a fundamental tenet of scientific activity, but the related issues of reusability of scientific data are poorly documented. Here, we present a case study of our difficulties to reproduce a published bioinformatics method even though code and data were available. First, we tried to re-run the analysis with the code and data provided by the authors. Second, we reimplemented the whole method in a Python package to avoid dependency on a MATLAB license and ease the execution of the code on a HPCC (High-Performance Computing Cluster). Third, we assessed reusability of our reimplementation and the quality of our documentation, testing how easy it would be to start from our implementation to reproduce the results. In a second section, we propose solutions from this case study and other observations to improve reproducibility and research efficiency at the individual and collective level. While finalizing our code, we created case specific documentation and tutorials for the associated Python package StratiPy. Readers are thus invited to experiment with our reproducibility case study by generating the two confusion matrices of Fig 3 (see more in 2.2.2).</p> <p>Here we decided to propose two options: 1) a step-by-step process to follow in a Jupyter/IPython notebook; or 2) a Docker container ready to be built and run. Availability: the latest version of StratiPy (Python) with two examples of reproducibility and dataset are available via GitHub <a href="https://github.com/GHFC/Stratipy">https://github.com/GHFC/Stratipy</a> and archived in Zenodo.</p> |                |
| <b>Corresponding Author:</b>                         | Yang-Min KIM<br>Institut Pasteur<br>Paris, Île-de-France FRANCE                                                                                                                                                                                                                                                                                                                                                                                                                                                                                                                                                                                                                                                                                                                                                                                                                                                                                                                                                                                                                                                                                                                                                                                                                                                                                                                                                                                                                                                                                                                                                                                                                                                          |                |
| <b>Corresponding Author Secondary Information:</b>   |                                                                                                                                                                                                                                                                                                                                                                                                                                                                                                                                                                                                                                                                                                                                                                                                                                                                                                                                                                                                                                                                                                                                                                                                                                                                                                                                                                                                                                                                                                                                                                                                                                                                                                                          |                |
| <b>Corresponding Author's Institution:</b>           | Institut Pasteur                                                                                                                                                                                                                                                                                                                                                                                                                                                                                                                                                                                                                                                                                                                                                                                                                                                                                                                                                                                                                                                                                                                                                                                                                                                                                                                                                                                                                                                                                                                                                                                                                                                                                                         |                |
| <b>Corresponding Author's Secondary Institution:</b> |                                                                                                                                                                                                                                                                                                                                                                                                                                                                                                                                                                                                                                                                                                                                                                                                                                                                                                                                                                                                                                                                                                                                                                                                                                                                                                                                                                                                                                                                                                                                                                                                                                                                                                                          |                |
| <b>First Author:</b>                                 | Yang-Min KIM, M.Sc.                                                                                                                                                                                                                                                                                                                                                                                                                                                                                                                                                                                                                                                                                                                                                                                                                                                                                                                                                                                                                                                                                                                                                                                                                                                                                                                                                                                                                                                                                                                                                                                                                                                                                                      |                |
| <b>First Author Secondary Information:</b>           |                                                                                                                                                                                                                                                                                                                                                                                                                                                                                                                                                                                                                                                                                                                                                                                                                                                                                                                                                                                                                                                                                                                                                                                                                                                                                                                                                                                                                                                                                                                                                                                                                                                                                                                          |                |

|                                                |                                                                                                                                                                                                                                                                                                                                                                                                                                                                                                                                                                                                                                                                                                                                                                                                                                                                                                                                                                                                                                                                                                                                                                                                                                                                                                                                                                                                                                                                                                                                                                                                                                                                                                                                                                                                                                                                                                                                                                                                                                                                                                                                                                                                                                                                                                                                                                                                                                                                                                                                                                                                                                                                                                                                                                                                                                                                                        |
|------------------------------------------------|----------------------------------------------------------------------------------------------------------------------------------------------------------------------------------------------------------------------------------------------------------------------------------------------------------------------------------------------------------------------------------------------------------------------------------------------------------------------------------------------------------------------------------------------------------------------------------------------------------------------------------------------------------------------------------------------------------------------------------------------------------------------------------------------------------------------------------------------------------------------------------------------------------------------------------------------------------------------------------------------------------------------------------------------------------------------------------------------------------------------------------------------------------------------------------------------------------------------------------------------------------------------------------------------------------------------------------------------------------------------------------------------------------------------------------------------------------------------------------------------------------------------------------------------------------------------------------------------------------------------------------------------------------------------------------------------------------------------------------------------------------------------------------------------------------------------------------------------------------------------------------------------------------------------------------------------------------------------------------------------------------------------------------------------------------------------------------------------------------------------------------------------------------------------------------------------------------------------------------------------------------------------------------------------------------------------------------------------------------------------------------------------------------------------------------------------------------------------------------------------------------------------------------------------------------------------------------------------------------------------------------------------------------------------------------------------------------------------------------------------------------------------------------------------------------------------------------------------------------------------------------------|
| <b>Order of Authors:</b>                       | Yang-Min KIM, M.Sc.<br>Jean-Baptiste Poline, PhD<br>Guillaume Dumas, PhD                                                                                                                                                                                                                                                                                                                                                                                                                                                                                                                                                                                                                                                                                                                                                                                                                                                                                                                                                                                                                                                                                                                                                                                                                                                                                                                                                                                                                                                                                                                                                                                                                                                                                                                                                                                                                                                                                                                                                                                                                                                                                                                                                                                                                                                                                                                                                                                                                                                                                                                                                                                                                                                                                                                                                                                                               |
| <b>Order of Authors Secondary Information:</b> |                                                                                                                                                                                                                                                                                                                                                                                                                                                                                                                                                                                                                                                                                                                                                                                                                                                                                                                                                                                                                                                                                                                                                                                                                                                                                                                                                                                                                                                                                                                                                                                                                                                                                                                                                                                                                                                                                                                                                                                                                                                                                                                                                                                                                                                                                                                                                                                                                                                                                                                                                                                                                                                                                                                                                                                                                                                                                        |
| <b>Response to Reviewers:</b>                  | <p>Dear Editor,</p> <p>We answered point-by-point all the insightful reviewer comments, with a specific focus on clarification in the text. We hope the revised manuscript conforms to the journal standards.</p> <p>Best regards,<br/>         Yang-Min KIM, on the behalf of all the authors</p> <p>***** [Reviewer comments] *****</p> <p>!! Conversion from word to PDF has changed some section numbers in the old version but we keep the correct numbers in this response.</p> <p>-----<br/>         -----</p> <p>Reviewer #1</p> <p>***** (1) "2.2 Robustness: from MATLAB to Python" and "2.3 Reproducibility of Robustness: from Python to Python" seem have a little overlap, because in Background they were parallel concept. Please reorganize the contents in these two parts. *****</p> <p>Since 2.2 is about robustness (change in code) and 2.3 is about re-running the python code on different platforms, it seems to us that this two sections can be kept separate, but the description of figure 2 has been moved from the end of paragraph 2.2.1 (Metadata and File formats, page 4, line 86) to the end of paragraph 2.2.3 (Documentation and examples, page 5, line 115) to conclude the robustness section. We also agree that the subheadings were not entirely consistent and reorganize some of the text (see below).</p> <p>***** (2) The subtitles need to be more logical, for example, 2.2.1 Metadata and File formats, and 2.2.2 Codes and parameters, but 2.2.3 Jupyter/IPython. The first two subtitles are describing the effect of data, format and code, parameter on the robustness, but the "Jupyter/IPython" is not a parallel concept with the first two subtitles on the robustness, they are only platform or shell environment. Please well design the subtitles or this subsection "Jupyter/IPython" can be integrated into the 2.2.2, in brief, please make it more logical for reading. In fact, in this paper, similar problems exist several places. *****</p> <p>We worked to make the logic of the text easier to follow and more consistent. In particular, we renamed several subsections like the "jupyter" subsection 2.2.3 into "Documentation and examples" (page 5, line 115), "environment" subsection 3.1.1 into "Publish software and their environment" (page 7, line 175) and "metadata" subsection 3.1.2 into "Document with appropriate Metadata" (page 7, line 187). We also split subsection "2.3 Reproducibility of Robustness: from Python to Python" into two parts: "2.3 Collaborative coding and best practices" (page 5, line 132) and "2.4 Reproducibility of Robustness: from Python to Python" (page 6, line 143).</p> <p>***** (3) Please pay attention to the first sentence of a paragraph, it should give the main spirit of the paragraph instead of just starting a new talking. For example,</p> |

"Once the environment, file format and data issues were resolved, the code was finally executed"... For another example, "Given the observed difficulties, in this section we draw some conclusions on this reproducibility case study experiment and suggest some tools and best practices.", why always "some conclusion"? why cannot directly summarize the conclusion here? Another example, "3.1.1 Environment In 1995, Buckheit and Donoho were already thinking about reproducible research in computer science", this is a composition or fiction genre instead of a scientific paper.

(4) After rewriting all first sentences for each paragraphs, please reorganize the content of their following sentences referring to other published scientific articles.

\*\*\*\*\*

We rewrote the first sentences of the paragraph across the paper.

Page 4, line 100, paragraph 2.2.2 Codes and parameters: we changed the sentence "Once the environment, file format and data issues were resolved, the code was finally executed" into "Beyond documentation and file formats, code initialization and parameters settings are also key for reproducibility."

Page 5, line 133, paragraph 2.3 Collaborative code development and best practices: "Throughout the project we used the version control system (VCS) Git to document the development of our Python package."

Page 6, line 144, paragraph 2.4 Reproducibility of Robustness: from Python to Python: "Knowing how difficult it can be to re-run someone else's code, we then attempted to start the analysis from scratch and to reproduce the results on another platform from our newly developed python package."

Page 7, line 172, paragraph 3.1 Act locally: simple practices and available tools: we replaced the sentence "Given the observed difficulties, in this section we draw some conclusions on this reproducibility case study experiment and suggest some tools and best practices." by "We conclude from this reproducibility case study experiment by suggesting tools and best practices following the programming best practices".

Page 7, line 176, paragraph 3.1.1 Publish software and their environment: regarding the sentence about Buckheit and Donoho, we totally rewrote it as follow: "Increased reproducibility and replicability can be obtained by following Buckheit and Donoho's long standing motto: "When we publish articles containing figures which were generated by computer, we also publish the complete software environment which generates the figures" by offering a complete and free package (WaveLab) to reproduce the published output [30]."

Page 7, line 195, paragraph 3.1.3 Write readable code: we changed the sentence "Anyone who has spent time to understand someone else's code would advise some simple basic rules to help make the code readable and understandable." into "We draw some conclusion from our experience in working with others code.". We then follow the reviewer advice to directly summarize the conclusion.

\*\*\*\*\* (5) Based on the size of core content of this article, please cut it down.  
\*\*\*\*\*

We removed some of the text to make it more dense.. Especially in the conclusion, we adopt a straightforward bullet-point list of key messages and recommendations:

Page 11, line 297: "To summarize, our experiment at reproducing initial results led to the following conclusions and recommendations:

- Improve life scientists software development skills
- Use online repositories and tools to help other scientists in their exploration of the method [26,27,31]
- Enhance the cooperation between academic education and industry [40,41,47]
- Develop an open source continuous testing ecosystem with community standards, well-identified datasets to validate tools across versions and datasets, and go beyond the publication of a PDF file"

|                                                                                                                                                                                                                                                                                                                                                                                                                                                                                                                          |                                                                                                                                                                                                                                                                                                               |
|--------------------------------------------------------------------------------------------------------------------------------------------------------------------------------------------------------------------------------------------------------------------------------------------------------------------------------------------------------------------------------------------------------------------------------------------------------------------------------------------------------------------------|---------------------------------------------------------------------------------------------------------------------------------------------------------------------------------------------------------------------------------------------------------------------------------------------------------------|
|                                                                                                                                                                                                                                                                                                                                                                                                                                                                                                                          | <p>In total we have reduced 217 words.</p> <p>-----</p> <p>-----</p> <p>Reviewer #2</p> <p>***** The authors have successfully responded to my comments. I congratulate the authors for a simple and nice paper. *****</p> <p>We thank reviewer 2 for all his helpful comments and interest in our paper.</p> |
| <b>Additional Information:</b>                                                                                                                                                                                                                                                                                                                                                                                                                                                                                           |                                                                                                                                                                                                                                                                                                               |
| <b>Question</b>                                                                                                                                                                                                                                                                                                                                                                                                                                                                                                          | <b>Response</b>                                                                                                                                                                                                                                                                                               |
| Are you submitting this manuscript to a special series or article collection?                                                                                                                                                                                                                                                                                                                                                                                                                                            | No                                                                                                                                                                                                                                                                                                            |
| <p><b>Experimental design and statistics</b></p> <p>Full details of the experimental design and statistical methods used should be given in the Methods section, as detailed in our <a href="#">Minimum Standards Reporting Checklist</a>. Information essential to interpreting the data presented should be made available in the figure legends.</p> <p>Have you included all the information requested in your manuscript?</p>                                                                                       | No                                                                                                                                                                                                                                                                                                            |
| <p>If not, please give reasons for any omissions below.</p> <p>as follow-up to "<b>Experimental design and statistics</b></p> <p>Full details of the experimental design and statistical methods used should be given in the Methods section, as detailed in our <a href="#">Minimum Standards Reporting Checklist</a>. Information essential to interpreting the data presented should be made available in the figure legends.</p> <p>Have you included all the information requested in your manuscript?</p> <p>"</p> | <p>This review is especially based on the reproducibility issues. The illustrated method is directly based on the original paper by Hofree et al, 2013. We nevertheless described any specific variations.</p>                                                                                                |
| <b>Resources</b>                                                                                                                                                                                                                                                                                                                                                                                                                                                                                                         | Yes                                                                                                                                                                                                                                                                                                           |
| A description of all resources used, including antibodies, cell lines, animals and software tools, with enough                                                                                                                                                                                                                                                                                                                                                                                                           |                                                                                                                                                                                                                                                                                                               |

|                                                                                                                                                                                                                                                                                                                                                                                                                                                                                                                                                         |            |
|---------------------------------------------------------------------------------------------------------------------------------------------------------------------------------------------------------------------------------------------------------------------------------------------------------------------------------------------------------------------------------------------------------------------------------------------------------------------------------------------------------------------------------------------------------|------------|
| <p>information to allow them to be uniquely identified, should be included in the Methods section. Authors are strongly encouraged to cite <a href="#">Research Resource Identifiers</a> (RRIDs) for antibodies, model organisms and tools, where possible.</p> <p>Have you included the information requested as detailed in our <a href="#">Minimum Standards Reporting Checklist</a>?</p>                                                                                                                                                            |            |
| <p><b>Availability of data and materials</b></p> <p>All datasets and code on which the conclusions of the paper rely must be either included in your submission or deposited in <a href="#">publicly available repositories</a> (where available and ethically appropriate), referencing such data using a unique identifier in the references and in the “Availability of Data and Materials” section of your manuscript.</p> <p>Have you have met the above requirement as detailed in our <a href="#">Minimum Standards Reporting Checklist</a>?</p> | <p>Yes</p> |

[Click here to view linked References](#)

# 1 Experimenting with Reproducibility: a case study of

## 2 1 Robustness in Bioinformatics

### 3 6 Authors

4 9 Yang-Min KIM <sup>1,2,3,4,\*</sup>, Jean-Baptiste Poline <sup>5,6</sup>, Guillaume Dumas <sup>1,2,3,4</sup>

5 11 <sup>1</sup>Institut Pasteur, Human Genetics and Cognitive Functions Unit, Paris, France, <sup>2</sup>CNRS UMR 3571 Genes, Synapses and

6 13 Cognition, Institut Pasteur, Paris, France, <sup>3</sup>University Paris Diderot, Sorbonne Paris Cité, Paris, France, <sup>4</sup>Centre de

7 15 Bioinformatique, Biostatistique et Biologie Intégrative (C3BI, USR 3756 Institut Pasteur and CNRS), Paris, France, <sup>5</sup>Montreal

8 17 Neurological Institute, Brain Imaging Center, Ludmer Center, McGill University, <sup>6</sup>Henry H. Wheeler Jr. Brain Imaging Center,

9 19 Helen Wills Neuroscience Institute, University of California, Berkeley, California, USA

10 21  
11 22  
12 23 \*To whom correspondence should be addressed

13 25 Correspondence: yang-min.kim@pasteur.fr, ORCID: 0000-0002-1583-3297; jbpoline@gmail.com; ORCID: 0000-0002-

14 27 9794-749X; guillaume.dumas@pasteur.fr, ORCID: 0000-0002-2253-1844

### 14 31 Abstract

15 33 Reproducibility has been shown to be limited in many scientific fields. This question is a fundamental tenet of scientific activity,

16 35 but the related issues of reusability of scientific data are poorly documented. Here, we present a case study of our difficulties to

17 37 reproduce a published bioinformatics method even though code and data were available. First, we tried to re-run the analysis with

18 39 the code and data provided by the authors. Second, we reimplemented the whole method in a Python package to avoid dependency

19 41 on a MATLAB license and ease the execution of the code on a HPCC (High-Performance Computing Cluster). Third, we assessed

20 43 reusability of our reimplementation and the quality of our documentation, testing how easy it would be to start from our

21 45 implementation to reproduce the results. In a second section, we propose solutions from this case study and other observations to

22 47 improve reproducibility and research efficiency at the individual and collective level.

23 49 While finalizing our code, we created case specific documentation and tutorials for the associated Python package *StratiPy*.

24 51 Readers are thus invited to experiment with our reproducibility case study by generating the two confusion matrices of Fig 3 (see

25 53 more in 2.2.2).

26 55 Here we decided to propose two options: 1) a step-by-step process to follow in a Jupyter/IPython notebook; or 2) a Docker

27 57 container ready to be built and run.

28 59 **Availability:** the latest version of *StratiPy* (Python) with two examples of reproducibility and dataset are available via GitHub

29 61 <https://github.com/GHFC/Stratipy> and archived in Zenodo.

## Keywords

- Reproducibility; Robustness; Reusability; Network Based Stratification (NBS); Standard consensus dataset; Cancer

## 1 Background

The collective endeavor of science depends on researchers being able to replicate the work of others. In a recent survey of 1,576 researchers, 70% of them admitted having difficulty in reproducing experiments proposed by other scientists [1]. For 50%, this reproducibility issue even concerns their own experiments. Despite the growing attention on the replication crisis in science [2,3], this controversial subject is far from being new: already in the 17th century, scientists criticized the air pump invented by physicist Robert Boyle because it was too complicated and expensive to build [4].

Several concepts for reproducibility in computational science are closely associated [5,6]. Here we define them as mentioned by K. Whitaker [6]: obtaining the same results using same data and same code is **Reproducibility**; if code is different, it is **Robustness**. If we used different data but with the same code, it is **Replicability**. Lastly, using different data and different code is referred as **Generalizability**. Here we will primarily elaborate on **Reproducibility** and **Robustness**, and acknowledge that new datasets or hardware environment introduce additional hurdles [7]. Reproducibility is a key first step, for instance, among the 400 algorithms published during the major artificial intelligence conferences, only 6% offered the code [8]. Even when authors provide data and code, the outcome can vary either marginally or fundamentally [9]. Tackling irreproducibility in bioinformatics thus requires considerable effort beyond code and data availability, an effort that is still poorly recognized in the current publication based research community. In most cases, there is a significant gap between apparent executable work (Fig 1 - i.e. above water portion of iceberg) and necessary effort in practice (Fig 1 - i.e. full iceberg). Such effort is necessary to increase the consistency of the literature and *efficiency* of the scientific research process by making research products easily reusable.

## 2 Reproducibility and Robustness in bioinformatics: a case study

### 2.1 Reproducibility: from MATLAB to MATLAB, OS and environment

Our team studies Autism Spectrum Disorders (ASD), a group of neurodevelopmental disorders well known for its heterogeneity.

One of the current challenges of our research is to uncover homogeneous subgroups of patients (i.e. stratification) with more precise clinical outcomes, improving their prognosis and treatment [10,11]. An interesting stratification method was recently proposed in the field of cancer research [12], where the authors proposed to combine genetic profiles of patients' tumors with protein-protein interaction networks to uncover meaningful homogeneous subgroups, a method called Network Based Stratification (NBS).

Before using NBS method on our data, we studied the method by reproducing results from the original study. We are very grateful to the main authors who kindly provided online all the related data and code, and gave us invaluable input upon request. The

59 authors of this study did much more to help reproduce their results than is generally done. Despite their help we experienced a  
60 number of difficulties that we document here, hoping that this report will help future researchers to improve the reproducibility of  
61 results and reusability of research products.

62 The first step of our project was to execute the original method code with the given data: reproducibility (Table 1). To improve  
63 execution speed, the original authors used a library for MATLAB on a Linux platform, using executable compiled code MEX file  
64 [13]: MTIMESX [14], a library allowing acceleration of large matrix multiplication. MEX files however are specific to the  
65 architecture and have to be recompiled for each Operating System (OS). Since our lab was using Mac OS X Sierra, the  
66 compilation of this MEX file into a mac64 binary required a new version of MTIMESX. It was also necessary to install and to  
67 configure properly OpenMP [15], a development library for parallel computing. After this, the original MATLAB code was  
68 successfully run in our environment.

|                                      | Code            | Data | Technical issues                                                                                                                                                                                                                                                                                                                   | Other issues                                                                                                                                                                                                               |
|--------------------------------------|-----------------|------|------------------------------------------------------------------------------------------------------------------------------------------------------------------------------------------------------------------------------------------------------------------------------------------------------------------------------------|----------------------------------------------------------------------------------------------------------------------------------------------------------------------------------------------------------------------------|
| <b>Reproducibility</b>               | Same: MATLAB    | Same | <b>OS:</b> MEX file specificity linked to OS (e.g. Linux → OSX)                                                                                                                                                                                                                                                                    |                                                                                                                                                                                                                            |
| <b>Robustness</b>                    | MATLAB → Python | Same | <b>File format:</b> we can load sparse matrices from <i>.mat</i> file but cannot save them into HDF5 using h5py package<br><b>Default parameters:</b> linkage method use for the hierarchical clustering <ul style="list-style-type: none"> <li>• MATLAB (MathWorks): UPGMA (average)</li> <li>• Python (SciPy): single</li> </ul> | <ul style="list-style-type: none"> <li>• Metadata structure</li> <li>• Important parameter value not explained in the original paper</li> <li>• Remaining discarded work ('code ruins') and traces of debugging</li> </ul> |
| <b>Reproducibility of Robustness</b> | Same: Python    | Same | <b>OS:</b> Numpy package and BLAS library compiled for specific OS (e.g. OSX → Linux)                                                                                                                                                                                                                                              | Documentation                                                                                                                                                                                                              |

69 **Table 1: Technical problems encountered during our reproducibility and robustness case study.**

70 These issues are classic but may not be overcome by researchers with little experience in compilation or installation issues. For  
71 these reasons alone, many individuals may turn down the opportunity of reusing code and therefore the method.

72 The next part will focus on code re-implementation, a procedure, which can help understanding the method, but is even more time  
73 consuming.

## 74 2.2 Robustness: from MATLAB to Python, language and organization

75 To fully master the method, we developed a complete open source toolkit of genomic stratification in Python [16]. Python is also  
76 an interpreted programming language, but contrary to MATLAB is free of use and has a GPL-compatible license [17], which  
77 fosters both robustness and generalizability. Recoding in another language in a different environment will lead to be some  
78 unavoidable problems such as variation in low level libraries (e.g. glibc): it is likely that the outcomes will vary even if the same  
79 algorithm is implemented [18]. In addition, we rely on Python packages to perform visualization or linear algebra computations  
80 (e.g. Matplotlib, SciPy, NumPy [19–21]), and results may depend on these packages versions. Python is currently in a transitional  
81 period between two major versions 2 and 3. We chose to write the code in Python 3, which is the current recommendation.



## 2.2.1 Metadata and file formats

Even if the original code could be run, we had to handle several file formats to check and understand the structure of the original data. For instance the data were provided by The Cancer Genome Atlas (TCGA) [22] and made available in a MATLAB *.mat* file format v7.2 as compressed data (sparse matrices). Thanks to SciPy, Python can load those MATLAB files version. We wanted to use the open format HDF5 for saving the results, however Scipy's sparse matrices could not be stored in HDF5 format (Table 1). We thus decided to continue saving in *.mat* format. Moreover, the original authors had denoted download dates of patients' data of TCGA, thereby clarifying the data provenance. But in the absence of structural metadata, we had to explore the hierarchical structure of the variables (e.g. patient ID, gene ID, phenotype).

## 2.2.2 Codes and parameters

Beyond documentation and file formats, code initialization and parameters settings are also keys for reproducibility. Upon execution of the code, "unexpected" results were obtained. One cause was the application of the hierarchical clustering step for which we used the clustering tools of SciPy. Both SciPy and MATLAB (MathWorks) functions offer seven linkage methods, however, SciPy's default option (single method) [23] differs from MATLAB's default option (UPGMA or average method) [24], which was used in the original study (Table 1). Another cause for the variation in results is the value of one of the most important parameters of the method, the graph regulator factor, which was not clarified in the original paper. From the article, we believed that this factor had a constant value of 1.0 until we found in the original code that its value varies across iterations and converges to an optimal value around 1800. Therefore, we initially obtained very different results from the original NBS (Fig 3 a) with heterogeneous subgroups. Once the optimal value was set up, we finally observed homogenous clusters (Fig 3 b). Moreover, during our attempts to run the original code to understand the causes of the errors, we realized that some parts of the code were not run anymore (e.g. discarded work, remaining traces of debugging) which made understanding the implementation harder. To allow others to reproduce our results, we wrote some documentation and tutorials for the Python package *StratiPy* [16]. Readers are thus invited to experiment with reproducibility by generating the two confusion matrices of Fig 3. This is described by the following different tools: GitHub, Docker, and Jupyter/IPython notebook.

## 2.2.3 Documentation and examples

During the re-coding process, we used an enhanced Python interpreter to debug: IPython, an interactive shell supporting both Python 2 and 3. Since the dataset is large and the execution takes a significant amount of time, we used IPython to re-run interactively some sub-sections of the script, which is one of the most helpful features. IPython can be integrated in the web interface Jupyter Notebook, offering an advanced structure for mixing code and documentation. While the Jupyter/IPython notebook was therefore initially convenient, it does not scale well to large programs and is not well adapted to versioning. However, ability of mixing code with document text is very useful for tutorials: a user of the code can read documentation (docstring), text explanations, and see how to run the code, explore parameters and visualize results in the browser. Our work on NBS, as related here, can be reproduced with a Jupyter/IPython notebook available via our GitHub repository [16]. One can find

114 more examples and several helpful links via this “gallery of interesting Jupyter Notebooks” [25], which contains a section about  
115 “Reproducible academic publications”.

116 1 To conclude, we were able to test the robustness of the method with our python implementation, but this took approximately two  
117 2 months of a senior researcher and six months of a master student. Fig 2 illustrate this work through an analogy between robustness  
118 3 issues and road transport: driving in a different environment (e.g. OS), we attempt to obtain identical results (i.e. to reach the same  
119 4 location) using the same input data (i.e. gasoline), but with different computational environment (i.e. cars), different  
120 5 implementation of the method (i.e. engine) and different programming languages (i.e. MATLAB and Python roads).

## 121 12 **2.3 Collaborative code development and best practices**

122 15 Throughout the project we used the version control system (VCS) Git to document the development of our Python package. Git is  
123 16 arguably one of the most powerful VCS, allowing easy development of branches and the distributed team (Paris, Berkeley,  
124 17 Montreal) to work collaboratively on the project. This project, *StratiPy*, is hosted on GitHub, a web-based Git repository hosting  
125 18 service [16]. While the original code was not available on GitHub, the main authors shared their code on a website. This should be  
126 19 sufficient for reproducibility and replicability our purposes but makes it less easy to collaborate on the code. While working on  
127 20 our GitHub repository, researchers from USA, India, China, and Europe contacted us about our robustness experiment. Not only  
128 21 GitHub supports a better organization of projects, it also facilitates the collaboration on open-source software projects through,  
129 22 thanks to its social network functions [26]. We adopted open source coding standards and learnt how to efficiently use Git and  
130 23 GitHub. Both required considerable training efforts on the short-term but brought clear benefits on the long-term, especially  
131 24 regarding collaboration and debugging.

## 132 37 **2.4 Reproducibility of Robustness: from Python to Python**

133 40 Knowing how difficult it can be to re-run someone else’s code, we then attempted to start the analysis from scratch and to  
134 41 reproduce the results on another platform from our newly developed python package. While the Python code was developed under  
135 42 Mac OS X Sierra (10.12), we used an Ubuntu 16.04.1 (Xenial) computer to test the Python implementation. Some additional  
136 43 issues emerged (Table 1). First, our initial documentation did not include the list of the required packages and instructions to  
137 44 launch the code. Second, the code was very slow to the extent that it was impractical to run it on a laptop because the Numpy  
138 45 package had not been compiled with BLAS (Basic Linear Algebra Subprograms) that speeds up low-level routines performing  
139 46 basic vector and matrix operations. Last, there was (initially) no easy way to check whether the results obtained on a different  
140 47 architecture were the expected ones. We added documentation and tests on the results files md5sum to solve this. To summarize,  
141 48 although the reuse and reproducibility of the results of the developed package were improved, these were far from being optimal  
142 49 in the first attempt.

## 143 3 Potential solutions: from local to global

### 144 1 3.1 Act locally: simple practices and available tools

145 4 We conclude this reproducibility case study experiment by suggesting tools and best practices following the programming best  
146 6 practices of Wilson et al., such as modularizing and re-using code, unit testing, document design, data management, and project  
147 8 organization [2,27], as well as keeping data provenance and recording all intermediate results [28].

#### 148 11 3.1.1 Publish software and their environment

149 13 Increased reproducibility and replicability can be obtained by following Buckheit and Donoho’s long standing motto: “When we  
150 15 publish articles containing figures which were generated by computer, we also publish the complete software environment which  
151 17 generates the figures” by offering a complete and free package (WaveLab) to reproduce the published output [29]. Container and  
152 19 virtual machines technologies such as Docker [30], Vagrant [31], Singularity [32,33] (easily works in cluster environments) are  
153 21 becoming a standard solution to mitigate installation issues. These rely however on competencies that we think too few biologists  
154 23 possess today. While a container might encapsulate everything needed for a software execution, it can be hard to develop in a  
155 25 container. For instance, running Jupyter/IPython notebooks in Docker containers requires knowledge on advanced port  
156 27 forwarding, which may be discouraging for many biologists. Therefore, we decided to propose two options in our example  
157 29 implementation of reproducibility: 1) a step-by-step process to follow in a Jupyter/IPython notebook; or 2) a Docker container  
158 31 ready to be built and run. Mastering Docker –or other container tools– is increasingly becoming an important skill for biologists  
159 33 who use computational tools.

#### 160 37 3.1.2 Document with appropriate Metadata

161 39 Standard metadata are vital for an efficient documentation of both data and software. In our example, we still lack the standard  
162 41 lexicon to document the data as well as documenting the software. We however aim to follow the recommendations by Stodden *et*  
163 43 *al.* [34]: “*Software metadata should include, at a minimum, the title, authors, version, language, license, Uniform Resource*  
164 45 *Identifier/DOI, software description (including purpose, inputs, outputs, dependencies), and execution requirements*”. The more  
165 47 comprehensive is the metadata description, the more likely the reuse will be both efficient and appropriate [35].

#### 166 50 3.1.3 Write readable code

167 53 We draw some conclusion from our experience in working with others code.

168 55 First, the structure of the program should be clear and easily accessible. Second, good concise code documentation and naming  
169 57 convention will help readability. Third, the code should not contain left-overs of previously tested solutions. When a solution  
170 59 takes a long time to compute, an option to store it locally can be proposed. Using standard coding and documentation conventions  
171 61 (e.g. PEP 8 and PEP 257 in Python [36,37]) with detailed comments and references of papers makes the code more accessible.  
172 63 When an algorithm is used, any modification from the original reference should be explained and discussed in the article as well

173 as in the code. We advocate for researchers to write code “for their colleagues”, hence, ask for the opinion and review of co-  
174 working or partner laboratories. Furthermore, the collaboration between researchers working on different environments can more  
175 easily isolate reproducibility problems. In the future, journals may consider review of code as part of the standard review process  
176 [38].

### 177 3.1.4 Test the code

178 To check if the code is yielding a correct answer, software developers associate test suites (unit tests or integration tests) with their  
179 software. While we developed only a few tests in this project, we realize that this practice has a number of advantages, such as  
180 checking if the software installation seems correct, check if updates in the code or in the operating system impact the results, etc.  
181 In our case, we propose to check for the integrity of the data and for the results of some key processing.

## 182 3.2 Think globally: from education to community standards

### 183 3.2.1 Training the new generation of scientists to digital tools and practices

184 The training in coding and software development is still too limited for biologists. Often, it is limited to self-training from  
185 searching answers on Stack Overflow or equivalent. Despite efforts by organizations such as Software [39] or Data Carpentry [40]  
186 and the growing demand for ‘data scientists’ in life sciences, university training and assessment on coding practices is still not  
187 generalized. The difficulty to access and understand code may lead to applying code blindly without checking the validity of the  
188 results: often, scientists may prefer to believe that results are correct because checking the validity of the results may require  
189 significant time. Mastering a package such that results are truly understood can take a long time, as it was the case in our  
190 experiment.

191 Academia could - and we argue should - instruct young scientists in best practices for reproducibility. For instance, Hothorn and  
192 Leisch organized a reproducibility workshop gathering mostly PhD students and young postdocs specialized in bioinformatics and  
193 biostatistics. Then they evaluated 100 random sample papers from *Bioinformatics* [3]. Their study revealed how such a workshop  
194 can raise young scientists awareness about “*what makes reproduction easy or hard at first hand*”. Indeed, they found out that only  
195 a third of the original papers and two-thirds for applications notes had given access to the source code of software used.

### 196 3.2.2 Standard consensus dataset and testing ecosystem

197 We propose here that bioinformatics methods publications are systematically accompanied with a test dataset, code source and  
198 some basic tests (given ethical and legal constraints). As the method is tested on new datasets, the number of tests and range of  
199 applications would expand. We give a first example with our NBS re-implementation.

200 A schematic overview of a possible testing ecosystem generalizing our test study is shown in Fig 4. The core of this system would  
201 be a set of standard consensus datasets used to validate methods. For instance in the field of machine learning, standard image  
202 databases are widely used for training and testing (e.g. MNIST for handwritten digits [41]). In the case of our proposal, data could

203 be from different categories such as binary, text, image (shown as folders in different colors, Fig 4 b), and sub-categories to  
204 introduce criteria such as size, quantitative/qualitative, discrete/continuous using a tagging system. Datasets could be issued from  
205 1 simulations or from acquisition, and would validate a method on a particular component. This testing ecosystem will help  
206 2 scientists that cannot release their data because of privacy issues (Fig 4 a.1) although these can often be overcome, but also give  
207 3 access to data and tests to a wide community including establishments with little financial means.  
208 4

208 5 We divide those who interact with scientific software or analysis code in two broad categories. First, the authors (“A”) who  
209 6 propose a method and need to verify its validity and usefulness with open and/or private – data. Second, the users (“U”, e.g.  
210 7 developers, engineers, bioinformaticians) who need to test and evaluate the proposed methods with other data.  
211 8

211 9 When authors propose a new method, we propose that authors and users progressively build its reproducibility profile (Fig 4 b.3,  
212 10 b.4) to document which method best work with which data. During the optimization of a project, the software code and associated  
213 11 documentation should be accessible to foster collaboration on additional use cases and data. When the work achieves some level  
214 12 of maturity, a full fledge article can be posted on a preprint servers such as bioRxiv [42,43] and be associated with a  
215 13 GitHub/GitLab repository with a digital object identifier (DOI). With considerable effort, Stodden *et al.* conducted a  
216 14 reproducibility study on 204 random articles of Science: despite some availability of the code, it had often been changed after  
217 15 publication, causing difficulties in replication [44]. In our proposed testing ecosystem, users will be able to launch reproducibility  
218 16 projects more easily thanks to code and article versioning.  
219 17

219 18 Users who test and approve reproducibility on original or new data could be accredited and recognized by the scientific and  
220 19 developer communities (i.e. Stack Overflow, GitHub). This testing ecosystem could thus facilitate collaborations between  
221 20 methodology development and biological research communities.  
222 21  
223 22  
224 23  
225 24  
226 25  
227 26  
228 27  
229 28  
230 29  
231 30  
232 31  
233 32  
234 33  
235 34  
236 35  
237 36  
238 37  
239 38  
240 39

## 4 Conclusion and perspective

240 40 In the 19<sup>th</sup> century, Pasteur introduced a detailed “Methods” section in his report: this advanced approach was necessary to  
241 41 reproduce his experiments and became the norm in the practice of science [45]. Today with the advent of computational science,  
242 42 the reproducibility issue is seen as a growing concern. To summarize, our experiment at reproducing initial results led to the  
243 43 following recommendations:  
244 44  
245 45

- 246 46 ● Improve life scientists software development skills  
247 47
- 248 48 ● Use online repositories and tools to help other scientists in their exploration of the method [25,26,30]  
249 49
- 250 50 ● Enhance the cooperation between academic education and industry [39,40,46]  
251 51
- 252 52 ● Develop an open source continuous testing ecosystem with community standards, well-identified datasets to validate  
253 53 tools across versions and datasets, and go beyond the publication of a PDF file  
254 54  
255 55  
256 56  
257 57

258 58 Verifying a previously published method can be a very time consuming, and is often poorly acknowledged. Some top-down  
259 59 initiatives already provide some incentives for such a process i.e. Horizon 2020 (H2020) [47] project of the European Commission  
260 60 (EC) mandates open access of research data, while respecting security and liability. H2020 supports OpenAIRE [48] a technical  
261 61  
262 62  
263 63  
264 64  
265 65

235 infrastructure of the open access, which allows the interconnection between projects, publications, datasets, and author  
236 information across Europe. Thanks to common guidelines, OpenAIRE interoperates with other web-based *generalist* scientific  
237 data repositories such as Zenodo, hosted by CERN, which allows the combination of data and GitHub repository via DOIs. The  
238 Open Science Framework also hosts data and software for a given project [49]. Respecting standard guidelines to transparently  
239 communicate the scientific work is a key step towards tackling irreproducibility and insures a robust scientific endeavor.

## 240 **Key points**

- 241 • Main barrier for reproducibility is in the lack of compatibility between environments, programming languages, software  
242 versions, etc.
- 243 • At the individual level, the key is in research practices such as well written, tested and documented code, and well  
244 curated data and the use of online repositories and collaborative tools.
- 245 • At the community level, we propose a testing ecosystem where standard consensus datasets are used to validate new  
246 methods and foster their generalizability.

## 247 **Declarations**

### 248 • **Abbreviations**

249 ASD: Autism Spectrum Disorders; BLAS: Basic Linear Algebra Subprograms; DOI: Digital Object Identifier; H2020: Horizon  
250 2020; OS: Operating System; TCGA: The Cancer Genome Atlas; VCS: version control system.

### 251 • **Ethics approval and consent to participate**

252 We used the uterine endometrial carcinoma dataset downloaded on January 1<sup>st</sup>, 2013 from the TCGA portal as used by Hofree and  
253 colleagues in their previous paper [12].

### 254 • **Consent for publication**

255 Not applicable

### 256 • **Availability of data and materials**

257 The latest version of StratiPy (Python) with two examples of reproducibility and dataset are available at GitHub [16], and archived  
258 via a Zenodo DOI [50]

### 259 • **Competing interests**

260 The authors declare that they have no competing interests.

261 • **Funding**

262 This work was supported by:

- 263 1 ○ Institut Pasteur (<http://dx.doi.org/10.13039/501100003762>)  
2
- 264 3 ○ H2020 Societal Challenges (<http://dx.doi.org/10.13039/100010676>)  
4
- 265 5 ○ Centre National de la Recherche Scientifique (<http://dx.doi.org/10.13039/501100004794>)  
6
- 266 7 ○ Université Paris Diderot (<http://dx.doi.org/10.13039/501100005736>)  
8
- 267 9 ○ Conny-Maeva Charitable Foundation  
10
- 268 11 ○ Cognacq-Jay Foundation  
12
- 269 13 ○ Orange (<http://dx.doi.org/10.13039/501100003951>)  
14
- 270 15 ○ Fondation pour la Recherche Médicale (<http://dx.doi.org/10.13039/501100002915>)  
16
- 271 17 ○ GenMed Labex  
18
- 272 19 ○ BioPsy Labex.  
20  
21

273 • **Authors' contributions**

274 24 Y-M. K., J-B. P., and G.D. wrote the manuscript, Y-M. K. and G.D. developed the StratiPy module.

275 26 YMK: Conceptualization, Software, Validation, Writing – original draft, Writing – review & editing

276 28 JBP: Validation; Writing – original draft, Writing – review & editing

277 30 GD: Conceptualization, Software, Supervision, Validation, Writing – original draft, Writing – review & editing.

278 32 All authors read and approved the final manuscript.  
34  
35

279 • **Acknowledgements**

280 36 We thank Thomas Rolland and Freddy Cliquet for sharing their advice and comments.  
39  
40

281 • **Authors' information**

282 41 **Yang-Min KIM**<sup>1,2,3,4,\*</sup> is a PhD student at Human Genetics and Cognitive Functions unit at the neuroscience department of the  
42  
283 43 Institut Pasteur in Paris. Her research on next-generation sequencing data and biological networks is focused on stratification of  
44  
284 45 patients with Autism.  
46  
47

285 48 *Keywords:* Autism Spectrum Disorder; Network; Protein-Protein Interaction; Personalize Medicine; Network-Based Stratification;  
49  
286 50 Computational Biology.  
51  
52

287 53  
288 54 **Jean-Baptiste Poline**<sup>5,6</sup> is a researcher at Henry H. Wheeler Jr. Brain Imaging Center, Helen Wills Neuroscience Institute,  
55  
289 56 University of California, Berkeley, California, USA. His research focuses on neuroimaging methods, imaging-genetic biostatistics  
57  
290 58 and neuroinformatics.  
59

291 60 *Keywords:* Neuroinformatics; Statistical methods; Brain imaging; Imaging genomics.  
61  
62  
63  
64  
65

293 **Guillaume Dumas**<sup>1,2,3,4</sup> is research fellow of the Human Genetics and Cognitive Functions unit at the neuroscience department of  
 294 1 the Institut Pasteur in Paris. His interdisciplinary work is at the cross-road of social psychology, cognitive neuroscience, and  
 295 2 system biology.  
 296 3 *Keywords:* Open Science; Complex Systems; Computational Biology; Cognitive Science; Social Neuroscience; Autism Spectrum  
 297 4 Disorder.  
 298 5  
 299 6  
 300 7

## 301 10 **References**

- 300 14 1. Baker M. 1,500 scientists lift the lid on reproducibility. *Nat News*. 2016;533:452.  
 301 16 2. Wilson G, Bryan J, Cranston K, Kitzes J, Nederbragt L, Teal TK. Good enough practices in scientific computing. *PLOS*  
 302 17 *Comput Biol*. 2017;13:e1005510.  
 303 19 3. Hothorn T, Leisch F. Case studies in reproducibility. *Brief Bioinform*. 2011;12:288–300.  
 304 21 4. Shapin S, Schaffer S. *Leviathan and the Air-Pump: Hobbes, Boyle, and the Experimental Life (New in Paper)*. Princeton  
 305 22 University Press; 2011.  
 306 24 5. Peng RD. Reproducible research in computational science. *Science*. 2011;334:1226–7.  
 307 26 6. Whitaker K. Showing your working: a how to guide to reproducible research. Figshare. 2017.  
 308 27 <https://doi.org/10.6084/m9.figshare.5443201.v1>  
 309 30 7. Nekrutenko A, Taylor J. Next-generation sequencing data interpretation: enhancing reproducibility and accessibility. *Nat Rev*  
 310 31 *Genet*. 2012;13:667–72.  
 311 33 8. Hutson M. Missing data hinder replication of artificial intelligence studies. *Science*. 2018. doi: 10.1126/science.aat3298  
 312 35 9. Herndon T, Ash M, Pollin R. Does high public debt consistently stifle economic growth? A critique of Reinhart and Rogoff.  
 313 36 *Camb J Econ*. 2014;38:257–79.  
 314 38 10. Bourgeron T. From the genetic architecture to synaptic plasticity in autism spectrum disorder. *Nat Rev Neurosci*.  
 315 39 2015;16:551–63.  
 316 41 11. Loth E, Spooren W, Ham LM, Isaac MB, Auriche-Benichou C, Banaschewski T, et al. Identification and validation of  
 317 42 biomarkers for autism spectrum disorders. *Nat Rev Drug Discov*. 2016;15:70–73.  
 318 44 12. Hofree M, Shen JP, Carter H, Gross A, Ideker T. Network-based stratification of tumor mutations. *Nat Methods*. 2013  
 319 45 *Nov*;10(11):1108–15. doi: 10.1038/nmeth.2651.  
 320 46 13. Introducing MEX Files - MATLAB & Simulink - MathWorks France  
 321 47 [https://fr.mathworks.com/help/matlab/matlab\\_external/introducing-mex-files.html?requestedDomain=www.mathworks.com](https://fr.mathworks.com/help/matlab/matlab_external/introducing-mex-files.html?requestedDomain=www.mathworks.com)  
 322 48 Accessed 1<sup>st</sup> June 2018  
 323 49  
 324 51 14. Tursa. MTIMESX - Fast Matrix Multiply with Multi-Dimensional Support - File Exchange - MATLAB Central.. 2009  
 325 52 <http://fr.mathworks.com/matlabcentral/fileexchange/25977-mtimesx-fast-matrix-multiply-with-multi-dimensional-support>  
 326 53 Accessed 1<sup>st</sup> June 2018  
 327 55 15. tim.lewis. OpenMP Specifications. <http://www.openmp.org/specifications/> Accessed 1<sup>st</sup> June 2018  
 328 57 16. Stratipy: Graph regularized nonnegative matrix factorization (GNMF) in Python. GHFC; 2017.  
 329 58 <https://github.com/GHFC/Stratipy>  
 330 60 17. Python Software Foundation. History and License — Python 3.6.1 documentation. 2017  
 331 61 <https://docs.python.org/3/license.html#licenses-and-acknowledgements-for-incorporated-software> Accessed 1<sup>st</sup> June 2018  
 332 62  
 333 63  
 334 64  
 335 65



- 332 18. Glatard T, Lewis LB, Ferreira da Silva R, Adalat R, Beck N, Lepage C, et al. Reproducibility of neuroimaging analyses across  
333 operating systems. *Front Neuroinformatics*. 2015;9:12.
- 334 19. Michael Droettboom, Thomas A Caswell, John Hunter, Eric Firing, Jens Hedegaard Nielsen, Antony Lee, ... Peter Würtz.  
335 1 (2018, March 17). *matplotlib/matplotlib v2.2.2 (Version v2.2.2)*. Zenodo. <http://doi.org/10.5281/zenodo.1202077>  
336 2
- 337 3 20. Pauli Virtanen, Ralf Gommers, Evgeni Burovski, Travis E. Oliphant, David Cournapeau, Warren Weckesser, ... Tyler Reddy.  
338 4 (2018, March 24). *scipy/scipy: SciPy 1.0.1 (Version v1.0.1)*. Zenodo. <http://doi.org/10.5281/zenodo.1206941>  
339 5
- 340 6 21. NumPy homepage <http://www.numpy.org/> Accessed 1<sup>st</sup> June 2018  
341 7
- 342 8 22. TCGA. Cancer Genome Atlas - Natl. Cancer Inst. <https://cancergenome.nih.gov/> Accessed 1<sup>st</sup> June 2018  
343 9
- 344 10 23. Eads. Hierarchical clustering (*scipy.cluster.hierarchy*) — SciPy v0.19.0 Reference Guide. 2007  
345 11 <https://docs.scipy.org/doc/scipy/reference/cluster.hierarchy.html> Accessed 1<sup>st</sup> June 2018  
346 12
- 347 13 24. Hierarchical Clustering - MATLAB & Simulink - MathWorks France. <https://fr.mathworks.com/help/stats/hierarchical-clustering-12.html> Accessed 1<sup>st</sup> June 2018  
348 14
- 349 15 25. A gallery of interesting Jupyter Notebooks · jupyter/jupyter Wiki. <https://github.com/jupyter/jupyter/wiki/A-gallery-of-interesting-Jupyter-Notebooks> Accessed 1<sup>st</sup> June 2018  
350 16
- 351 17 26. Blischak JD, Davenport ER, Wilson G. A Quick Introduction to Version Control with Git and GitHub. *PLoS Comput Biol*.  
352 18 2016;12:e1004668.  
353 19
- 354 20 27. Wilson G, Aruliah DA, Brown CT, Chue Hong NP, Davis M, Guy RT, et al. Best Practices for Scientific Computing. Eisen  
355 21 JA, editor. *PLoS Biol*. 2014;12:e1001745.  
356 22
- 357 23 28. Sandve GK, Nekrutenko A, Taylor J, Hovig E. Ten Simple Rules for Reproducible Computational Research. Bourne PE,  
358 24 editor. *PLoS Comput Biol*. 2013;9:e1003285-4.  
359 25
- 360 26 29. Buckheit JB, Donoho DL. WaveLab and Reproducible Research. *Wavelets Stat.*. Springer, New York, NY; 1995. p. 55–81.  
361 27 [https://link.springer.com/chapter/10.1007/978-1-4612-2544-7\\_5](https://link.springer.com/chapter/10.1007/978-1-4612-2544-7_5)  
362 28
- 363 29 30. Boettiger C. An introduction to Docker for reproducible research, with examples from the R environment. *ACM SIGOPS  
364 30 Oper Syst Rev*. 2015;49:71–9.  
365 31
- 366 32 31. Introduction. Vagrant HashiCorp.. <https://www.vagrantup.com/intro/index.html> Accessed 1<sup>st</sup> June 2018  
367 33
- 368 34 32. Singularity homepage.. <http://singularity.lbl.gov/> Accessed 1<sup>st</sup> June 2018  
369 35
- 370 36 33. Kurtzer GM, Sochat V, Bauer MW. Singularity: Scientific containers for mobility of compute. *PLOS ONE*.  
371 37 2017;12:e0177459.  
372 38
- 373 39 34. Stodden V, McNutt M, Bailey DH, Deelman E, Gil Y, Hanson B, et al. Enhancing reproducibility for computational methods.  
374 40 *Science*. 2016;354:1240–1.  
375 41
- 376 42 35. Hill SL. How do we know what we know? Discovering neuroscience data sets through minimal metadata. *Nat Rev Neurosci*.  
377 43 2016;17:735–6.  
378 44
- 379 45 36. PEP 8 -- Style Guide for Python Code. Python.org. [cited 2017 Aug 21]. <https://www.python.org/dev/peps/pep-0008/>  
380 46
- 381 47 37. PEP 257 -- Docstring Conventions. Python.org. <https://www.python.org/dev/peps/pep-0257/>  
382 48
- 383 49 38. Eglen SJ, Marwick B, Halchenko YO, Hanke M, Sufi S, Gleeson P, et al. Toward standard practices for sharing computer  
384 50 code and programs in neuroscience. *Nat Neurosci*. 2017;20:770–3.  
385 51
- 386 52 39. Software Carpentry website. <http://software-carpentry.org//index.html> Accessed 1<sup>st</sup> June 2018  
387 53
- 388 54 40. Data Carpentry website. <http://www.datacarpentry.org/> Accessed 1<sup>st</sup> June 2018  
389 55
- 390 56 41. MNIST handwritten digit database, Yann LeCun, Corinna Cortes and Chris Burges. <http://yann.lecun.com/exdb/mnist/>  
391 57
- 392 58 42. Bourne PE, Polka JK, Vale RD, Kiley R. Ten simple rules to consider regarding preprint submission. *PLOS Comput Biol*.  
393 59 2017;13:e1005473.  
394 60
- 395 61  
396 62  
397 63  
398 64  
399 65

373 43. Preprints in biology. Nat Methods. 2016;13:277–277.

374 44. Stodden V, Seiler J, Ma Z. An empirical analysis of journal policy effectiveness for computational reproducibility. Proc Natl  
375 Acad Sci. 2018;115:2584–9.

1  
376 2 45. Day RA, Gastel B. Historical Perspectives. Write Publ Sci Pap Seventh Ed. ABC-CLIO; 2011. p. 6–8.  
3

377 4 46. Academia – Industry Software Quality & Testing summit - ISTQB® International Software Testing Qualifications Board.  
378 5 [http://www.istqb.org/special-initiatives/istqb-conference-network-2istqb-conference-network-academia/academia-%E2%80%93-  
379 6 industry-software-quality-testing-summit.html](http://www.istqb.org/special-initiatives/istqb-conference-network-2istqb-conference-network-academia/academia-%E2%80%93-379 6 industry-software-quality-testing-summit.html)  
7

380 8 47. Open Research Data in Horizon 2020. [https://ec.europa.eu/research/press/2016/pdf/opendata-infographic\\_072016.pdf](https://ec.europa.eu/research/press/2016/pdf/opendata-infographic_072016.pdf)  
9

38110 48. Open Access in Horizon 2020 - EC funded projects <https://www.openaire.eu/edocman?id=749&task=document.viewdoc>  
11

38212 49. Foster ED, Deardorff A. Open Science Framework (OSF). J Med Libr Assoc JMLA. 2017;105:203–6.  
13

38314 50. Kim Yang-Min, Poline Jean-Baptiste, Dumas Guillaume. StratiPy. Zenodo; 2017. <https://doi.org/10.5281/zenodo.1042546>  
38415  
16  
17  
18

## 38519 **Figure legends**

38622 **Figure 1: Hidden reproducibility issues are like an underwater iceberg.** Scientific journals readers have the impression that  
23  
38724 they can almost see the full work of method. But in reality, articles do not take into account adjustment and configuration for  
25  
38826 significant replication in most cases. Therefore, there is a significant gap between apparent executable work (i.e. above water  
27  
38928 portion of iceberg) and necessary effort in practice (i.e. the full iceberg).  
29  
39030

39132 **Figure 2: Analogy between robustness issues and road transport.** The aim is to achieve same output (i.e. to reach the same  
33  
39234 location) using published methods (i.e. engine). Despite the same input data (i.e. gasoline), we obtained different results due to  
35  
39336 different programming languages —e.g. MATLAB and Python— (i.e. different roadways) and environments (i.e. different  
37  
39438 vehicles).  
39  
39540  
41

39642 **Figure 3: Normalized confusion matrices between original and replicated results.** Before (a) and after (b) applying  
43  
39744 appropriate value of graph regularization factor on NBS method. Each row or column corresponds to a subgroup of patients (here  
45  
39846 three subgroups). The diagonal elements show the frequency of correct classifications for each subgroup: a high value indicates a  
47  
39948 correct prediction.  
49  
40050  
51

40152 **Figure 4: Working principles of testing ecosystem with private data.** Figure 4a shows a classical case: (a.1) Authors take  
53  
40254 private data (e.g. blue data) then publish their method and corresponding results; (a.2) Users having their own data (e.g. orange  
55  
40356 data) find a relevant paper but will be lost in the labyrinth of reproducibility. Figure 4b shows testing ecosystem with standard  
57  
40458 consensus dataset: (b.1) If authors work with their own data, they must identify corresponding standard data tag(s) (e.g. blue data);  
59  
40560 (b.2) Authors initiate to develop their method with corresponding standard data and reproducibility profile will be progressively  
61  
40662 built. Bar length on iceberg corresponds to progression of replication test; (b.3) Users can test proposed method with other  
63  
64  
65

407 standard data (e.g. orange and green data) and thus participate to enhancement of the reproducibility profile; (b.4) Thanks to the  
408 collective work on testing, the method could be optimized and authors can upgrade their initial paper (versioning).

1  
2  
3  
4  
5  
6  
7  
8  
9  
10  
11  
12  
13  
14  
15  
16  
17  
18  
19  
20  
21  
22  
23  
24  
25  
26  
27  
28  
29  
30  
31  
32  
33  
34  
35  
36  
37  
38  
39  
40  
41  
42  
43  
44  
45  
46  
47  
48  
49  
50  
51  
52  
53  
54  
55  
56  
57  
58  
59  
60  
61  
62  
63  
64  
65

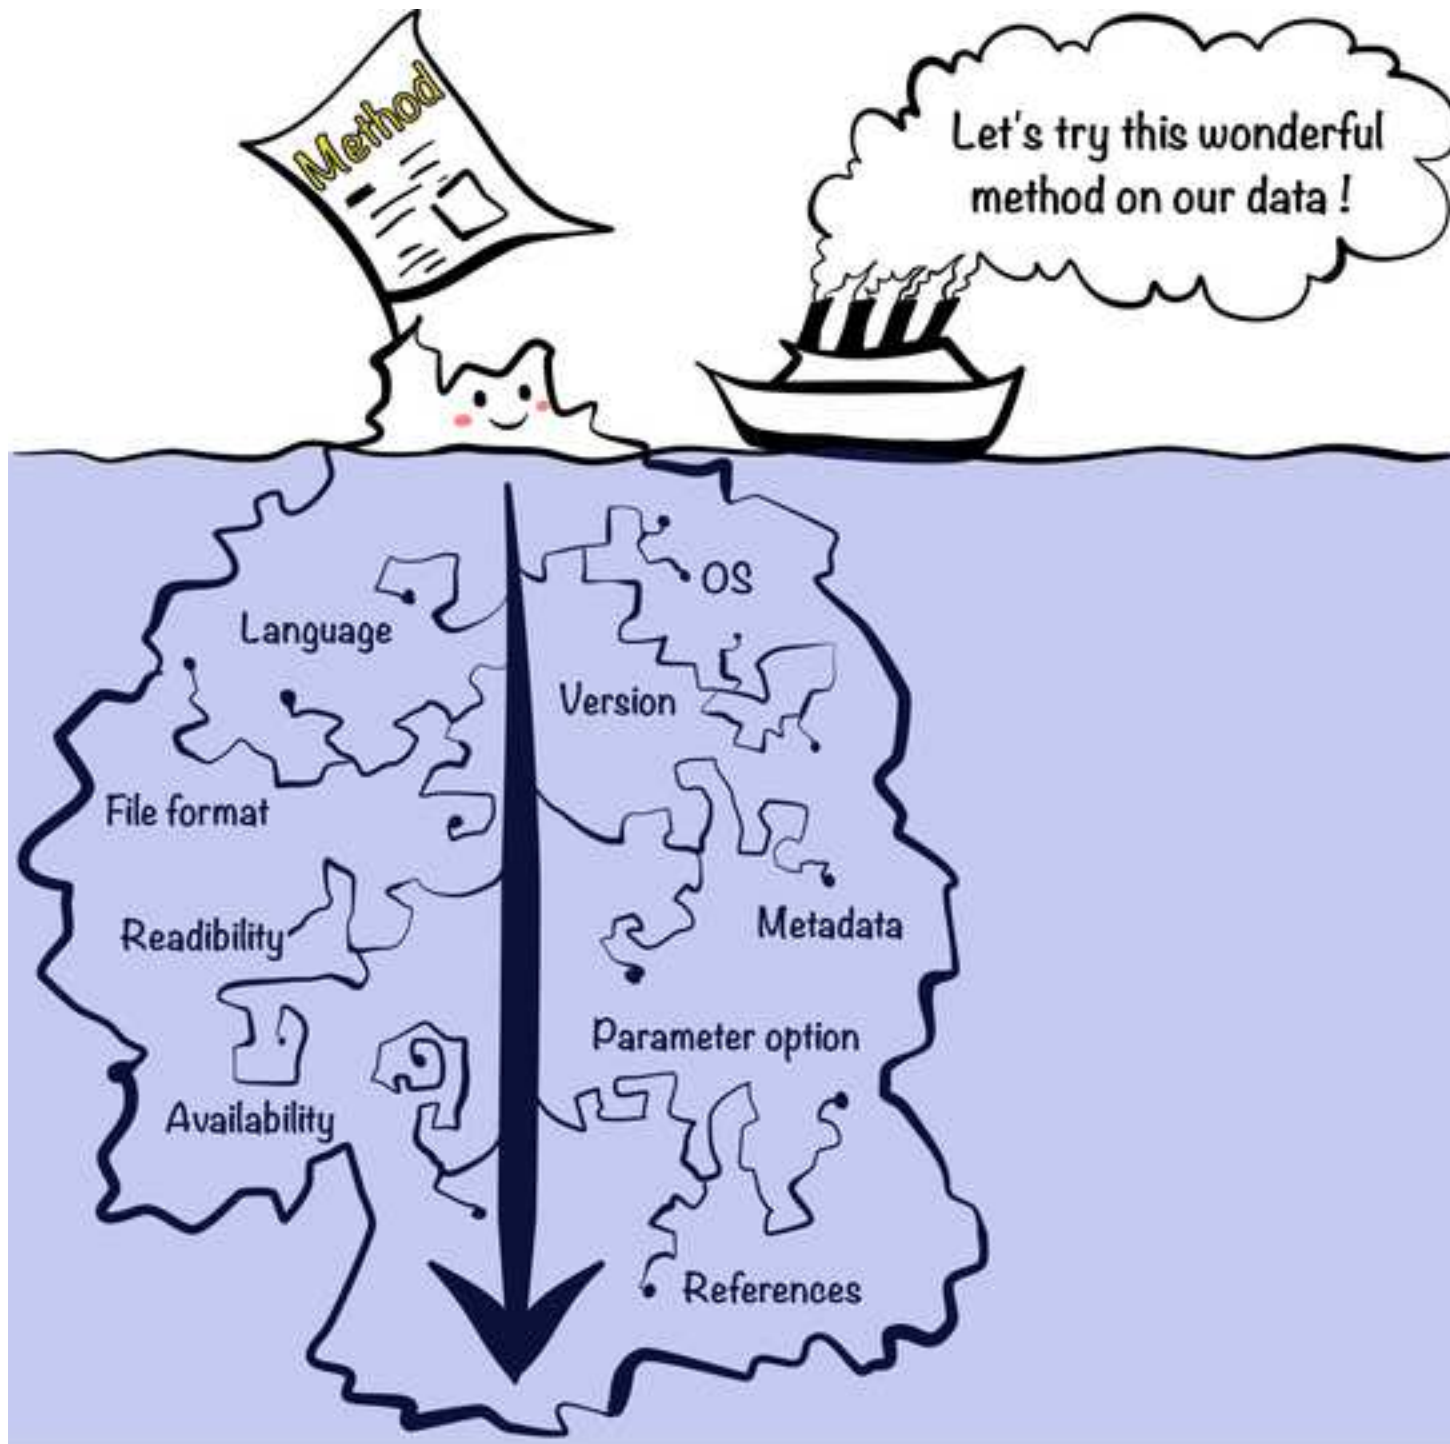

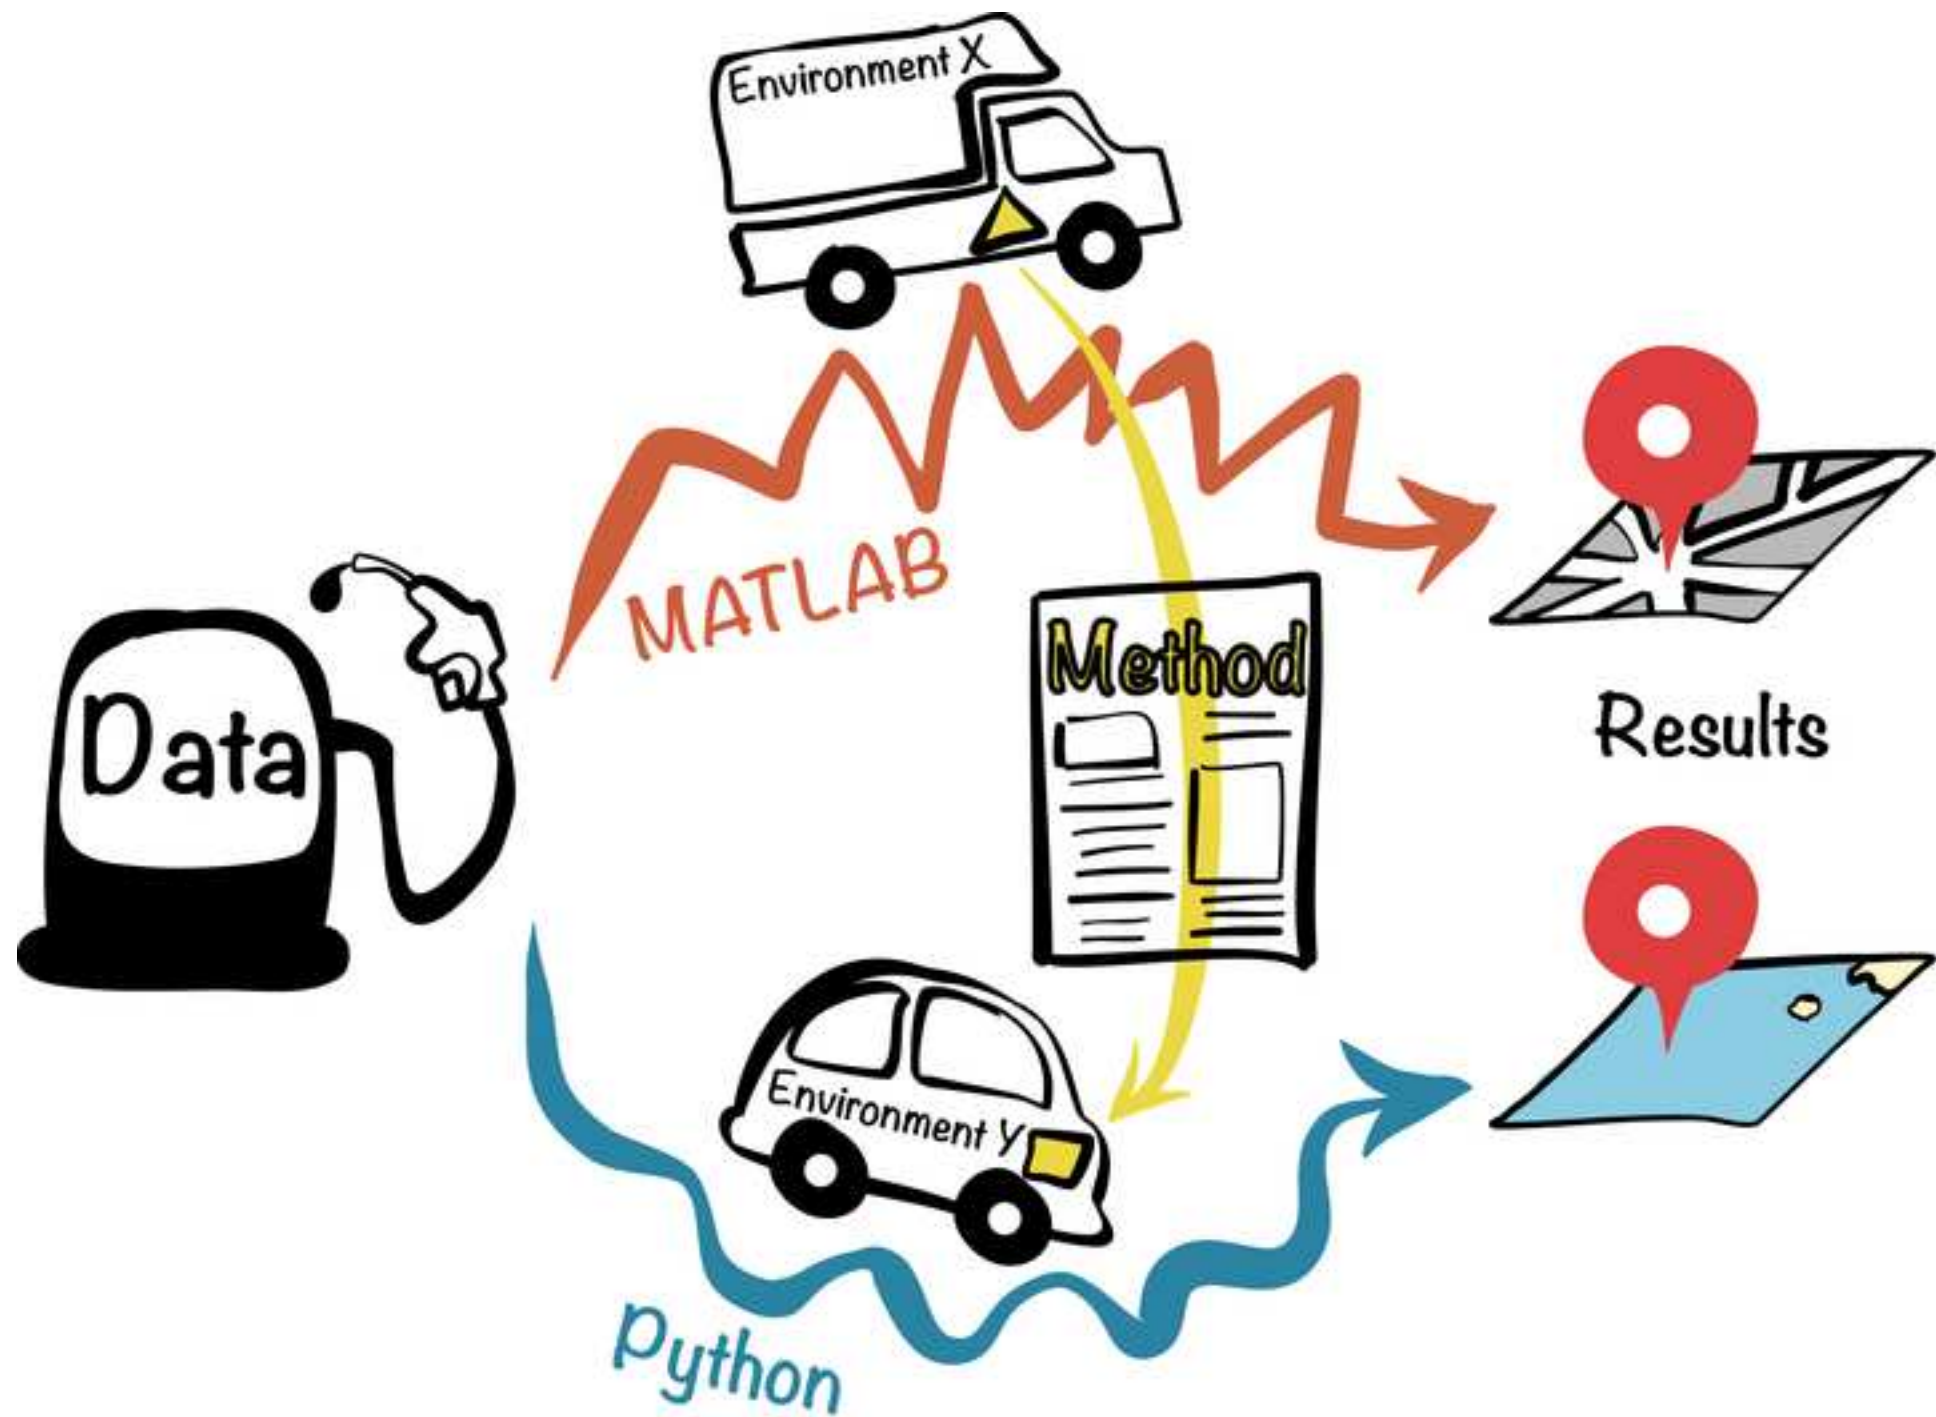

**a** Confusion matrix with reported tuning parameter value ( $\lambda = 1$ )

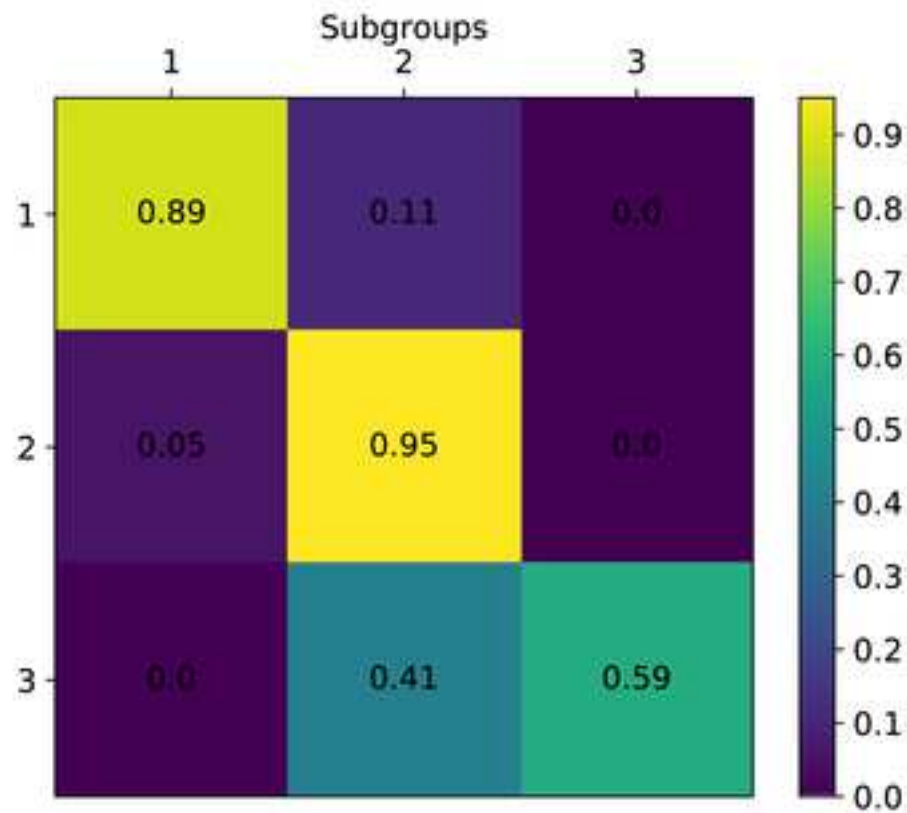

**b** Confusion matrix with actually used tuning parameter value ( $\lambda = 1800$ )

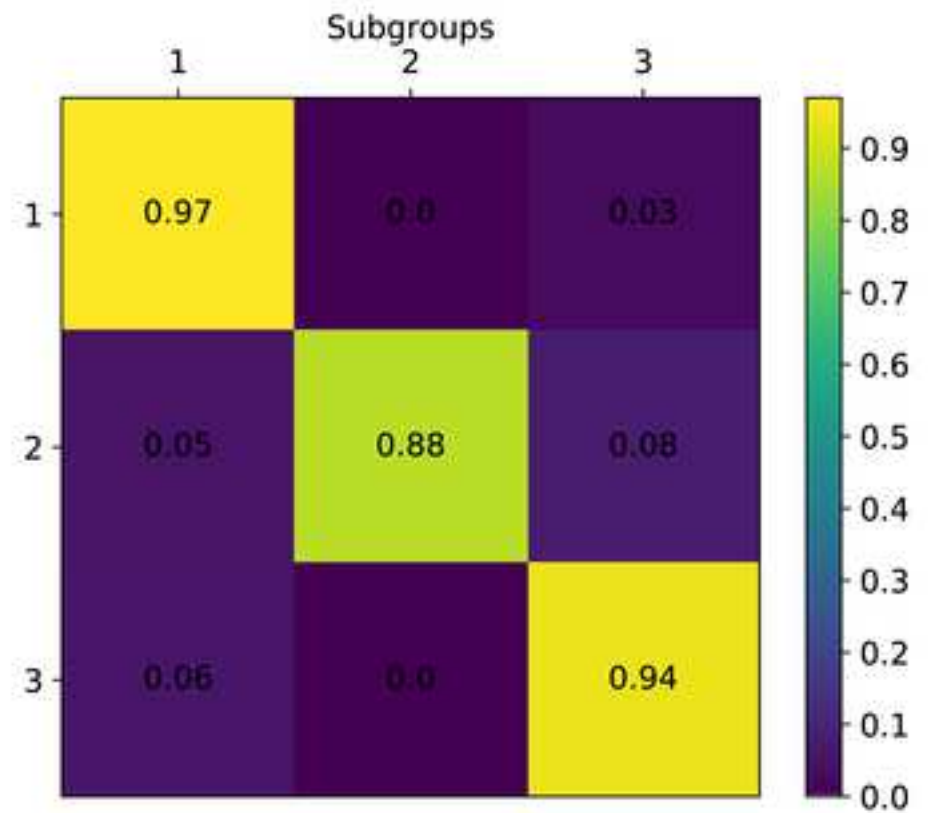

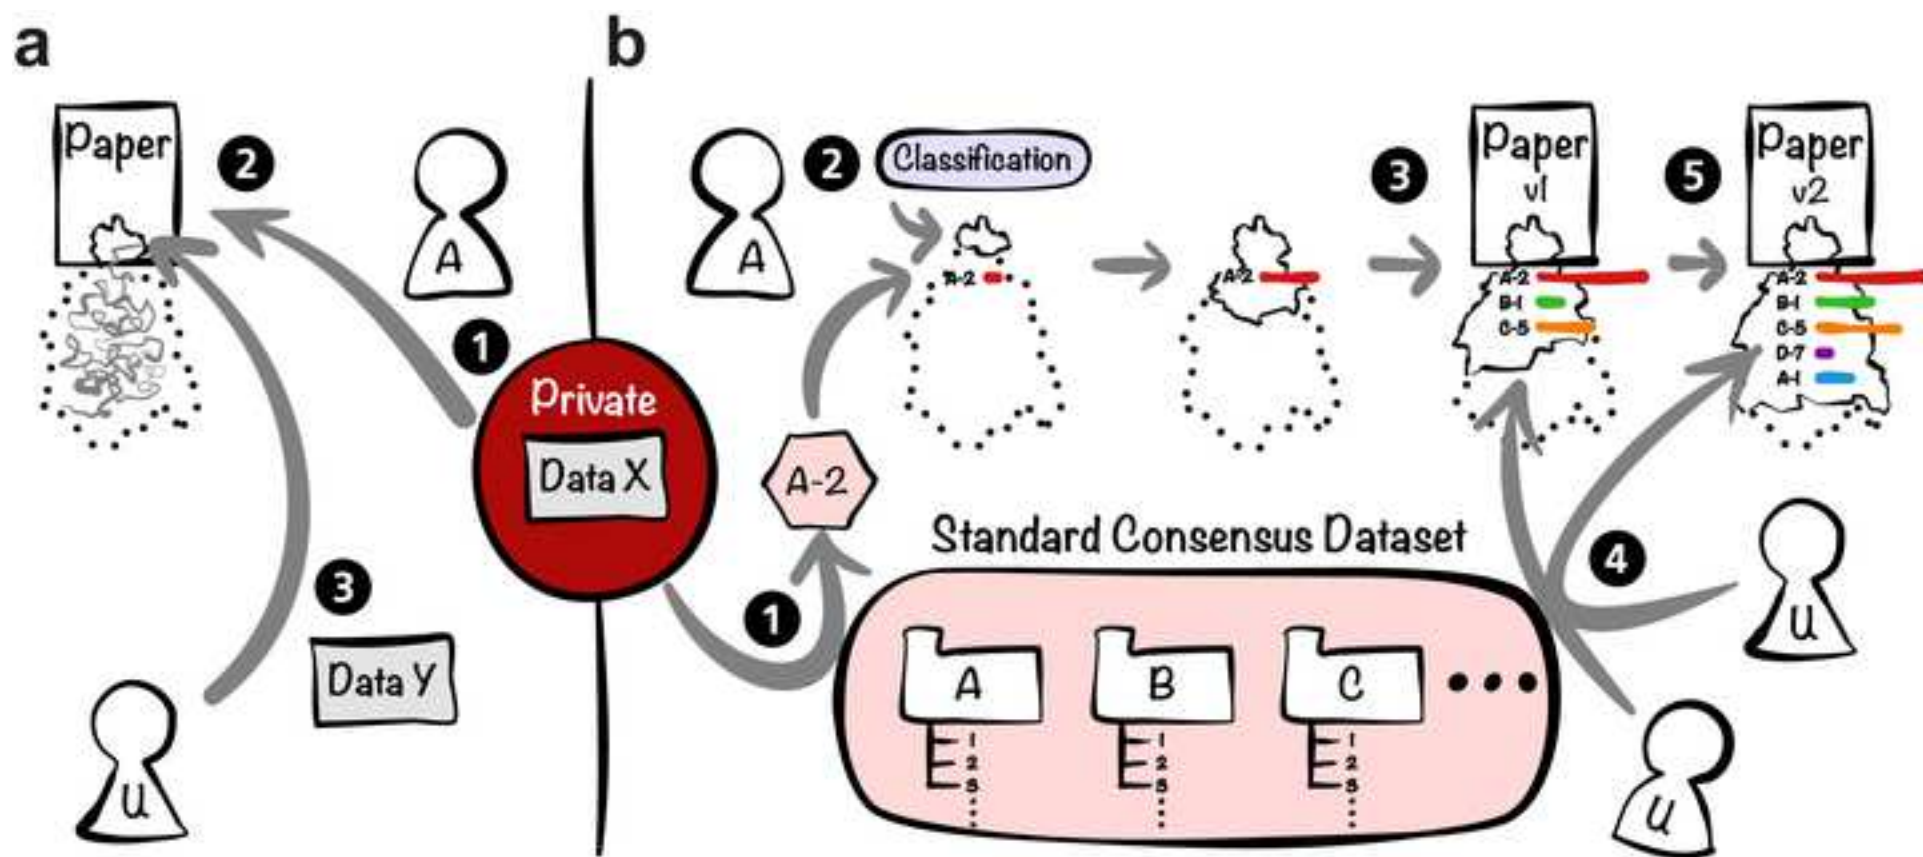

Supplement: giy077_giga-d-17-00317_revision_2.pdf [file giy077_giga-d-17-00317_revision_2.pdf]
