# Supplementary material for: Experimenting with reproducibility: a case study of robustness in bioinformatics
Source: PubMed Central journal article supplement (PMC6054242; doi:10.1093/gigascience/giy077), 2018-06-28
Supplement: giy077_giga-d-17-00317_original_submission.pdf [file giy077_giga-d-17-00317_original_submission.pdf]

# GigaScience

## Experimenting with reproducibility in bioinformatics

--Manuscript Draft--

|                                                      |                                                                                                                                                                                                                                                                                                                                                                                                                                                                                                                                                                                                                                                                                                                                                                                                                                                                                                                                                                                                                                                                                                                                                                                              |                |
|------------------------------------------------------|----------------------------------------------------------------------------------------------------------------------------------------------------------------------------------------------------------------------------------------------------------------------------------------------------------------------------------------------------------------------------------------------------------------------------------------------------------------------------------------------------------------------------------------------------------------------------------------------------------------------------------------------------------------------------------------------------------------------------------------------------------------------------------------------------------------------------------------------------------------------------------------------------------------------------------------------------------------------------------------------------------------------------------------------------------------------------------------------------------------------------------------------------------------------------------------------|----------------|
| <b>Manuscript Number:</b>                            | GIGA-D-17-00317                                                                                                                                                                                                                                                                                                                                                                                                                                                                                                                                                                                                                                                                                                                                                                                                                                                                                                                                                                                                                                                                                                                                                                              |                |
| <b>Full Title:</b>                                   | Experimenting with reproducibility in bioinformatics                                                                                                                                                                                                                                                                                                                                                                                                                                                                                                                                                                                                                                                                                                                                                                                                                                                                                                                                                                                                                                                                                                                                         |                |
| <b>Article Type:</b>                                 | Review                                                                                                                                                                                                                                                                                                                                                                                                                                                                                                                                                                                                                                                                                                                                                                                                                                                                                                                                                                                                                                                                                                                                                                                       |                |
| <b>Funding Information:</b>                          | Institut Pasteur (FR)                                                                                                                                                                                                                                                                                                                                                                                                                                                                                                                                                                                                                                                                                                                                                                                                                                                                                                                                                                                                                                                                                                                                                                        | Not applicable |
|                                                      | H2020 Health                                                                                                                                                                                                                                                                                                                                                                                                                                                                                                                                                                                                                                                                                                                                                                                                                                                                                                                                                                                                                                                                                                                                                                                 | Not applicable |
|                                                      | Institut National des Sciences de l'Univers, Centre National de la Recherche Scientifique (FR)                                                                                                                                                                                                                                                                                                                                                                                                                                                                                                                                                                                                                                                                                                                                                                                                                                                                                                                                                                                                                                                                                               | Not applicable |
|                                                      | Université Paris Diderot (FR)                                                                                                                                                                                                                                                                                                                                                                                                                                                                                                                                                                                                                                                                                                                                                                                                                                                                                                                                                                                                                                                                                                                                                                | Not applicable |
|                                                      | Conny-Maeva Charitable Foundation                                                                                                                                                                                                                                                                                                                                                                                                                                                                                                                                                                                                                                                                                                                                                                                                                                                                                                                                                                                                                                                                                                                                                            | Not applicable |
|                                                      | Cognacq-Jay Foundation                                                                                                                                                                                                                                                                                                                                                                                                                                                                                                                                                                                                                                                                                                                                                                                                                                                                                                                                                                                                                                                                                                                                                                       | Not applicable |
|                                                      | Orange                                                                                                                                                                                                                                                                                                                                                                                                                                                                                                                                                                                                                                                                                                                                                                                                                                                                                                                                                                                                                                                                                                                                                                                       | Not applicable |
|                                                      | Fondation pour la Recherche Médicale                                                                                                                                                                                                                                                                                                                                                                                                                                                                                                                                                                                                                                                                                                                                                                                                                                                                                                                                                                                                                                                                                                                                                         | Not applicable |
|                                                      | GenMed Labex                                                                                                                                                                                                                                                                                                                                                                                                                                                                                                                                                                                                                                                                                                                                                                                                                                                                                                                                                                                                                                                                                                                                                                                 | Not applicable |
|                                                      | BioPsy Labex                                                                                                                                                                                                                                                                                                                                                                                                                                                                                                                                                                                                                                                                                                                                                                                                                                                                                                                                                                                                                                                                                                                                                                                 | Not applicable |
| <b>Abstract:</b>                                     | <p>Reproducibility has been shown to be limited in many scientific fields. This question is a fundamental tenet of the scientific activity, but the related issues of reusability of scientific data are poorly documented. Here, we present a case study of our attempt to reproduce a promising bioinformatics method [1] and illustrate the challenges to use a published method for which code and data were available. First, we tried to re-run the analysis with the code and data provided by the authors. Second, we reimplemented the method in Python to avoid dependency on a MATLAB licence and ease the execution of the code on HPCC (High-Performance Computing Cluster). Third, we assessed reusability of our reimplementation and the quality of our documentation. Then, we experimented with our own software and tested how easy it would be to start from our implementation to reproduce the results, hence attempting to estimate the robustness of the reproducibility. Finally, in a second part, we propose solutions from this case study and other observations to improve reproducibility and research efficiency at the individual and collective level.</p> |                |
| <b>Corresponding Author:</b>                         | Yang-Min KIM<br>Institut Pasteur<br>Paris, Île-de-France FRANCE                                                                                                                                                                                                                                                                                                                                                                                                                                                                                                                                                                                                                                                                                                                                                                                                                                                                                                                                                                                                                                                                                                                              |                |
| <b>Corresponding Author Secondary Information:</b>   |                                                                                                                                                                                                                                                                                                                                                                                                                                                                                                                                                                                                                                                                                                                                                                                                                                                                                                                                                                                                                                                                                                                                                                                              |                |
| <b>Corresponding Author's Institution:</b>           | Institut Pasteur                                                                                                                                                                                                                                                                                                                                                                                                                                                                                                                                                                                                                                                                                                                                                                                                                                                                                                                                                                                                                                                                                                                                                                             |                |
| <b>Corresponding Author's Secondary Institution:</b> |                                                                                                                                                                                                                                                                                                                                                                                                                                                                                                                                                                                                                                                                                                                                                                                                                                                                                                                                                                                                                                                                                                                                                                                              |                |
| <b>First Author:</b>                                 | Yang-Min KIM                                                                                                                                                                                                                                                                                                                                                                                                                                                                                                                                                                                                                                                                                                                                                                                                                                                                                                                                                                                                                                                                                                                                                                                 |                |
| <b>First Author Secondary Information:</b>           |                                                                                                                                                                                                                                                                                                                                                                                                                                                                                                                                                                                                                                                                                                                                                                                                                                                                                                                                                                                                                                                                                                                                                                                              |                |
| <b>Order of Authors:</b>                             | Yang-Min KIM                                                                                                                                                                                                                                                                                                                                                                                                                                                                                                                                                                                                                                                                                                                                                                                                                                                                                                                                                                                                                                                                                                                                                                                 |                |
|                                                      | Jean-Baptiste Poline                                                                                                                                                                                                                                                                                                                                                                                                                                                                                                                                                                                                                                                                                                                                                                                                                                                                                                                                                                                                                                                                                                                                                                         |                |
|                                                      | Guillaume Dumas                                                                                                                                                                                                                                                                                                                                                                                                                                                                                                                                                                                                                                                                                                                                                                                                                                                                                                                                                                                                                                                                                                                                                                              |                |
| <b>Order of Authors Secondary Information:</b>       |                                                                                                                                                                                                                                                                                                                                                                                                                                                                                                                                                                                                                                                                                                                                                                                                                                                                                                                                                                                                                                                                                                                                                                                              |                |
| <b>Opposed Reviewers:</b>                            | Matan Hofree                                                                                                                                                                                                                                                                                                                                                                                                                                                                                                                                                                                                                                                                                                                                                                                                                                                                                                                                                                                                                                                                                                                                                                                 |                |

|                                                                                                                                                                                                                                                                                                                                                                                                                                                                                                                          |                                                                                                                                                                                                                                                                    |
|--------------------------------------------------------------------------------------------------------------------------------------------------------------------------------------------------------------------------------------------------------------------------------------------------------------------------------------------------------------------------------------------------------------------------------------------------------------------------------------------------------------------------|--------------------------------------------------------------------------------------------------------------------------------------------------------------------------------------------------------------------------------------------------------------------|
|                                                                                                                                                                                                                                                                                                                                                                                                                                                                                                                          | <p>Broad Institute<br/>mhofree@broadinstitute.org<br/>our reproducibility work is based on his paper</p> <p>Trey Ideker<br/>University of California San Diego Ideker Laboratory<br/>tideker@ucsd.edu<br/>our reproducibility work is based on his lab's paper</p> |
| <b>Additional Information:</b>                                                                                                                                                                                                                                                                                                                                                                                                                                                                                           |                                                                                                                                                                                                                                                                    |
| <b>Question</b>                                                                                                                                                                                                                                                                                                                                                                                                                                                                                                          | <b>Response</b>                                                                                                                                                                                                                                                    |
| Are you submitting this manuscript to a special series or article collection?                                                                                                                                                                                                                                                                                                                                                                                                                                            | No                                                                                                                                                                                                                                                                 |
| <p><b>Experimental design and statistics</b></p> <p>Full details of the experimental design and statistical methods used should be given in the Methods section, as detailed in our <a href="#">Minimum Standards Reporting Checklist</a>. Information essential to interpreting the data presented should be made available in the figure legends.</p> <p>Have you included all the information requested in your manuscript?</p>                                                                                       | No                                                                                                                                                                                                                                                                 |
| <p>If not, please give reasons for any omissions below.</p> <p>as follow-up to "<b>Experimental design and statistics</b></p> <p>Full details of the experimental design and statistical methods used should be given in the Methods section, as detailed in our <a href="#">Minimum Standards Reporting Checklist</a>. Information essential to interpreting the data presented should be made available in the figure legends.</p> <p>Have you included all the information requested in your manuscript?</p> <p>"</p> | <p>This review is especially based on the reproducibility issues. The illustrated method is directly based on the original paper by Hofree et al, 2013. We nevertheless described any specific variations.</p>                                                     |
| <p><b>Resources</b></p> <p>A description of all resources used, including antibodies, cell lines, animals and software tools, with enough information to allow them to be uniquely identified, should be included in the Methods section. Authors are strongly encouraged to cite <a href="#">Research Resource Identifiers</a> (RRIDs) for antibodies, model organisms and tools, where possible.</p>                                                                                                                   | Yes                                                                                                                                                                                                                                                                |

|                                                                                                                                                                                                                                                                                                                                                                                                                                                                                                                                                         |            |
|---------------------------------------------------------------------------------------------------------------------------------------------------------------------------------------------------------------------------------------------------------------------------------------------------------------------------------------------------------------------------------------------------------------------------------------------------------------------------------------------------------------------------------------------------------|------------|
| <p>Have you included the information requested as detailed in our <a href="#">Minimum Standards Reporting Checklist</a>?</p>                                                                                                                                                                                                                                                                                                                                                                                                                            |            |
| <p><b>Availability of data and materials</b></p> <p>All datasets and code on which the conclusions of the paper rely must be either included in your submission or deposited in <a href="#">publicly available repositories</a> (where available and ethically appropriate), referencing such data using a unique identifier in the references and in the “Availability of Data and Materials” section of your manuscript.</p> <p>Have you have met the above requirement as detailed in our <a href="#">Minimum Standards Reporting Checklist</a>?</p> | <p>Yes</p> |

# Experimenting with Reproducibility in Bioinformatics

## Authors

Yang-Min KIM<sup>1,2,3,4,\*</sup>, Jean-Baptiste Poline<sup>5,6</sup>, Guillaume Dumas<sup>1,2,3,4</sup>

<sup>1</sup>Institut Pasteur, Human Genetics and Cognitive Functions Unit, Paris, France, <sup>2</sup>CNRS UMR 3571 Genes, Synapses and Cognition, Institut Pasteur, Paris, France, <sup>3</sup>University Paris Diderot, Sorbonne Paris Cité, Paris, France, <sup>4</sup>Centre de Bioinformatique, Biostatistique et Biologie Intégrative (C3BI, USR 3756 Institut Pasteur and CNRS), Paris, France, <sup>5</sup>Montreal Neurological Institute, Brain Imaging Center, Ludmer Center, McGill University, <sup>6</sup>Henry H. Wheeler Jr. Brain Imaging Center, Helen Wills Neuroscience Institute, University of California, Berkeley, California, USA

\*To whom correspondence should be addressed

Correspondence: [yang-min.kim@pasteur.fr](mailto:yang-min.kim@pasteur.fr); [jbpoline@gmail.com](mailto:jbpoline@gmail.com); [guillaume.dumas@pasteur.fr](mailto:guillaume.dumas@pasteur.fr)

## Abstract

Reproducibility has been shown to be limited in many scientific fields. This question is a fundamental tenet of the scientific activity, but the related issues of reusability of scientific data are poorly documented. Here, we present a case study of our attempt to reproduce a promising bioinformatics method [1] and illustrate the challenges to use a published method for which code and data were available. First, we tried to re-run the analysis with the code and data provided by the authors. Second, we reimplemented the method in Python to avoid dependency on a MATLAB licence and ease the execution of the code on HPC (High-Performance Computing Cluster). Third, we assessed reusability of our reimplementation and the quality of our documentation. Then, we experimented with our own software and tested how easy it would be to start from our implementation to reproduce the results, hence attempting to estimate the robustness of the reproducibility. Finally, in a second part, we propose solutions from this case study and other observations to improve reproducibility and research efficiency at the individual and collective level.

**Availability:** last version of StratiPy (Python) with two examples of reproducibility and dataset are available at GitHub [2].

## Keywords

- Reproducibility
- Robustness
- Reusability
- Network Based Stratification (NBS)

29 • Standard consensus dataset

30 • Cancer

# 1 Background

The collective endeavour of science depends on researchers being able to replicate the work of others. In a recent survey of 1,576 researchers, 70% of them admitted having difficulty in reproducing experiments proposed by other scientists [3]. For 50%, this reproducibility issue even concerns with their own experiments. Despite the growing attention on the replication crisis in science [4,5], this controversial subject is far from being new: already in the 17th century, scientists criticized the air pump invented by physicist Robert Boyle because it was too complicated and expensive to build [6].

Several concepts for reproducibility in computational science are closely associated [7,8]. Here we define them as mentioned by K. Whitaker [8]: obtaining the same results using same data and same code is **Reproducibility**; if code is different, it is **Robustness**. If we used different data but with the same code, it is **Replicability**. lastly, using different data and different code is referred as **Generalisability**. Here we will primarily elaborate on **Reproducibility** and **Robustness**. Indeed, it takes great efforts and competence to overcome all the obstacles to reproduce successfully an experiment. The process is costly in resources, both in time and funding. In computational science, there are also many technical barriers ranging from unavailable data to hardware infrastructure [9]. Even when authors provide data and code, the outcome can vary either marginally or fundamentally [10]. Tackling irreproducibility in bioinformatics thus requires considerable effort beyond code and data availability. In most cases, there is a significant gap between apparent executable work (Fig 1 - i.e. above water portion of iceberg) and necessary effort in practice (Fig 1 - i.e. full iceberg). Such effort is nevertheless necessary to increase the consistency of the literature and efficiency of the scientific research process. Indeed, behind reproducibility hides reusability.

## 2 Reproducibility and Robustness in bioinformatics: a case study

### 2.1 Reproducibility: from MATLAB to MATLAB, OS and environment

Our team studies Autism Spectrum Disorders (ASD), a group of neurodevelopmental disorders well known for its heterogeneity. One of the current challenges of our research is to uncover homogeneous subgroups of patients (i.e. stratification) with more precise clinical outcomes, improving their prognosis and treatment [11,12]. An interesting stratification method was recently proposed in the field of cancer research [1], where the authors proposed to combine genetic profiles of patients' tumours with protein-protein interaction networks to uncover meaningful homogeneous subgroups, a method called Network Based Stratification (NBS).

57 Before using this NBS method on our data, we studied the method by reproducing results from the original study. We are very  
58 grateful to the main authors who kindly provided online all the related data and code, and gave us invaluable input upon request.  
59 1 The authors of this study thus should not be blamed for the difficulty that we experienced in attempting to reproduce and to make  
60 2 more robust their study, as they did more to help reproduce their results than is generally done. Despite their help we experienced  
61 3 a number of difficulties that we document here, hoping that this report will help future researchers to improve the reproducibility  
62 4 of results and reusability of research products.  
63 5 The first step of our project was to execute the original method code with the given data: reproducibility. The programming code  
64 6 was written in MATLAB, an interpreted language originally developed for linear algebra computations which is easier and faster  
65 7 to write as well as more readable than compiled language such as C, making our reproducibility attempt easier. To improve  
66 8 execution speed, the original authors used a library for MATLAB using executable compiled code MEX file [13] callable from  
67 9 MATLAB: MTIMESX [14], a library with compiled code allowing acceleration of large matrix multiplication. MEX files  
68 10 however are specific to the architecture and have to be recompiled for each Operating System (OS). The original MEX file was  
69 11 initially developed for Linux. Since our lab was using Mac OS X Sierra, the compilation of this MEX file into a mac64 binary  
70 12 required a new version of MTIMESX. It was also necessary to install and to configure properly OpenMP [15], a development  
71 13 library for parallel computing. After this, the original MATLAB code was successfully run in our environment.  
72 14 These issues are classic, but may not be overcome by researchers with little experience in compilation or installation issues. For  
73 15 these reasons alone, many individuals may turn down the opportunity of reusing code.  
74 16 The next part will focus on code re-implementation, a procedure, which can help understanding the method, but can be even more  
75 17 costly.

## 76 18 **2.2 Robustness: from MATLAB to Python, language and organization**

77 19 To fully master the method, adapt it to our data, and ease its reuse, we developed a complete open source toolkit of genomic  
78 20 stratification in Python [2]. Python is also an interpreted programming language, but contrary to MATLAB is free of use and has a  
79 21 GPL-compatible license [16], which fosters both robustness and generalizability. Recoding in another language in a different  
80 22 environment will lead to be some unavoidable problems such as variation in low level libraries (e.g. glibc): it is likely that the  
81 23 outcomes will vary even if the same algorithm is implemented, and therefore should indicate how sensitive the proposed method  
82 24 results are with respect to these settings. In addition, we rely on Python packages to perform visualization or linear algebra  
83 25 computations (e.g. Matplotlib, SciPy, NumPy), and results may depend on these packages versions. Python is currently in a  
84 26 transitional period between two major versions 2 and 3. We chose to write the code in Python 3, which is the current  
85 27 recommendation.

## 86 2.2.1 Metadata and File formats

87 Even if the original code could be run, we had to handle several file formats to check and understand the structure of the original  
88 1 data. For instance the data on patients with cancer data was provided by The Cancer Genome (TCGA) [17] and made available in  
2  
89 3 a MATLAB *.mat* file format. Thanks to SciPy, Python can load all versions through v7.2 MATLAB files. To read v7.3 *.mat* files,  
4  
90 5 we however needed an HDF5 Python library. Moreover, the original authors had denoted download dates of patients' data of  
6  
91 7 TCGA, thereby clarifying source of data. But in the absence of structural metadata, it was not always obvious how to interpret  
8  
92 9 patients' dataset variables (e.g. patient ID, gene ID, phenotype). Fig 2 shows an analogy between robustness issues and road  
10  
93 11 transport: driving in a different environment (e.g. OS), we attempt to obtain identical results (i.e. to reach the same location) using  
12  
94 13 the same input data of TCGA (i.e. gasoline). But there is a difficult to transfer proposed method (i.e. engine) from one  
14  
95 15 programming language to another (i.e. MATLAB and Python roads).  
16  
17

## 96 18 2.2.2 Codes and parameters

97 21 Once the environment and file format issues were resolved, the code was finally executable with genetic data. Unfortunately,  
22  
98 23 several attempts produced error messages. Alternatively, "unexpected" results were obtained: e.g. during the application of  
24  
99 25 hierarchical clustering, we used the clustering tools of SciPy. Both SciPy and MATLAB (MathWorks) functions offer seven  
26  
100 27 linkage methods, however, SciPy's default option (single method) [18] differs from MATLAB's default option (UPGMA or  
28  
101 29 average method) [19], which was used in the original study. Another key example is the value of one of the most important  
30  
102 31 parameters of the method, the graph regulator factor, which was not clarified in the original paper. We believed that this factor had  
32  
103 33 a constant value of 1.0 until we found in the code that during iterations, its value was changing and converged to a high optimal  
34  
104 35 value (~1800). Therefore, we initially obtained very different results from the original NBS (Fig 3). We observed heterogeneous  
36  
105 37 subgroups instead of obtaining homogeneous clusters. No or little explanation on the parameter choices can explain variability in  
38  
106 39 the results as we explored the possible parameters range. Moreover, during our attempts to run the original code to understand the  
40  
107 41 causes of the errors, we realized that some parts of the code were not run anymore (e.g. discarded work, remaining traces of  
42  
108 43 debugging) which made the attempt to understand the implementation harder.  
44  
109 45

110 47 To allow others to reproduce our results, we created documentation and tutorials for the associated Python package *StratiPy* [2].  
48  
111 49 Readers are thus invited to experiment with reproducibility too by generating the two confusion matrices of Fig 3. They will use  
50  
112 51 the different tools described in the following: GitHub, Docker, and Jupyter/IPython notebook.  
52  
53

## 113 54 2.2.3 Jupyter/IPython

114 56 During the re-cording process, we used an enhanced Python interpreter to debug: IPython, an interactive shell supporting both  
57  
115 58 Python 2 and 3. Since the dataset is large and the execution takes a significant amount of time, we used IPython to re-run  
59  
116 60 interactively some sub-sections of the script, which is one of the most helpful features. IPython can be integrated in the web  
61  
62  
63  
64  
65

117 interface Jupyter Notebook, offering an advanced structure for mixing code and documentation. For instance, verifying  
118 intermediate results by plotting helped us to better understand the original code. While the Jupyter/IPython notebook was  
119 therefore initially convenient, it does not scale well and is not well adapted to versioning. However, ability of mixing code with  
120 document text is very useful for tutorials: a user of the code can read documentation (docstring), text explanations, and see how to  
121 run the code, explore parameters and visualize results in the browser. Our work on NBS, as related here, can be reproduced with a  
122 Jupyter/IPython notebook available on our GitHub [2]. You can find more examples and several helpful links on this “gallery of  
123 interesting Jupyter Notebooks” [20], which even contains a section about “Reproducible academic publications”.

## 124 2.3 Reproducibility of Robustness: from Python to Python

125 Besides Jupyter/IPython notebook, we used versioning tools like the git code version control system (VCS) to document the  
126 development of our Python code. Git is arguably one of the most powerful VCS, allowing easy development of branches and  
127 helping us to work together as a distributed team (Paris, Berkeley) on the same project. This project, *StratiPy*, is hosted on  
128 GitHub, a web-based Git repository hosting service [2]. While the original code was not available on GitHub, the main authors  
129 shared their code on a website. This should be sufficient for our purpose, but makes it less easy to collaborate on code. While  
130 working on our GitHub repository, several researchers from all over the world contacted us about our robustness experiment. Not  
131 only GitHub supports a better organization of projects, it also facilitates the collaboration of open-source software projects, thanks  
132 to several social network functions [21]. We tried to comply with open source coding standards and to learn how to efficiently use  
133 Git and GitHub. Both required considerable efforts on the short-term but brought clear benefits on the long-term, especially  
134 regarding collaboration and debugging.

135 We then attempted to re-run and reproduce the results we obtained on another platform. While the Python code was developed  
136 under Mac OS X Sierra (10.12) we used an Ubuntu 16.04.1 (Xenial) computer to test the Python implementation. Some additional  
137 issues emerged. First, our initial documentation was not complete enough to know which packages were required and how to  
138 launch the code. Second, the code was very slow to the extent that it was impractical to run it on a laptop because the Numpy  
139 package had not been compiled with BLAS (Basic Linear Algebra Subprograms), low-level routines performing basic vector and  
140 matrix operations. Last, there was (initially) no easy way to check whether the results obtained on a different architecture were the  
141 expected ones. We added documentation and tests on the results files md5sum to solve this. To summarize, although the reuse and  
142 reproducibility of the results of the developed package were improved, these were far from being optimal.



144 1 **3.1 Act locally: simple practices and available tools**  
2  
3

145 4 Given the observed difficulties, we draw some conclusions on this reproducibility case study experiment and suggest some  
5  
146 6 practices and tools. In addition to this guidance, scientists are strongly encouraged to follow detailed advice of Wilson et al. such  
7  
147 8 as modularizing and re-using code, unit testing, document design, data management, and project organization [4,22]. Sandve and  
9  
148 10 colleagues [23] also suggest to keep the data provenance with recording all intermediate results.  
11  
12

149 13 **3.1.1 Environment**  
14

150 15 Container technologies such as Docker [24], Vagrant [25], or Singularity [26,27] (easily works in cluster environments) are  
16  
151 17 becoming a standard solution to installation issues. These rely however on competencies that we think few biologists possess  
18  
152 19 today. Also, while the container will encapsulate everything needed for the software execution, it could be hard to develop in a  
20  
153 21 container. For instance, running Jupyter/IPython notebooks in Docker's container requires certain knowledge of computer science  
22  
154 23 (e.g. advanced port forwarding), which can become a discouraging task. Therefore, we decided to propose two options in our  
24  
155 25 example implementation of reproducibility: 1) a step-by-step process to follow in a Jupyter/IPython notebook; or 2) a Docker  
26  
156 27 container ready to be built and run. Nevertheless, mastering Docker –or other container tools– will become an important skill for  
28  
157 29 computational reproducible researchers.  
30  
31

158 32 **3.1.2 Metadata**  
33  
34

159 35 Standard metadata are vital for an efficient documentation of both data and software. In our example, we still lack the standard  
36  
160 37 lexicon to document the data as well as documenting the software: e.g. using HDF5 file instead of *.mat* file is more suitable to  
38  
161 39 store patient's' data. We however aim to follow the recommendations by Stodden *et al.* [28]: “*Software metadata should include,*  
40  
162 41 *at a minimum, the title, authors, version, language, license, Uniform Resource Identifier/DOI, software description (including*  
42  
163 43 *purpose, inputs, outputs, dependencies), and execution requirements*”. The more comprehensive is the metadata description, the  
44  
164 45 more likely the reuse will be both efficient and appropriate [29].  
46  
47

165 48 **3.1.3 Write readable code**  
49

166 50 Anyone who has spent time to understand someone else's code would advise some simple basic rules to help make the code  
51  
167 52 readable and understandable.  
53

168 54 First, the structure of the program should be clear and easily accessible. Second, good concise code documentation and naming  
55  
169 56 convention will help readability. Third, the code should not contain left-overs of previously tested solutions. When a solution  
57  
170 58 takes a long time to compute, an option to store it locally can be proposed. Using standard coding and documentation conventions  
59  
60

171 (e.g. PEP 8 and PEP 257 in Python [30,31]) with detailed comments and references of papers makes the code more accessible.  
172 When an algorithm from another paper is used, any modification should be explained and discussed in the paper as well as in the  
173 code. All these remarks are not necessarily obvious especially if the developer is working on her/his own, and to some extent  
174 “writes for her/himself”. We advocate for researchers to write code “for their colleagues”, hence, the opinion and notice of co-  
175 working or partner laboratories should be very helpful. Furthermore, the collaboration between researchers working on different  
176 environments can more easily isolate reproducibility problems. In the future, journals may consider review of code as part of the  
177 standard review process.

### 178 **3.1.4 Test the code**

179 To check if the code is yielding a correct answer, software developers associate test suites (unit tests or integration tests) with their  
180 software. While we developed only a few tests in this project, we realize that this has a number of advantages, such as checking if  
181 the software installation seems correct, check if updates in the operating system impact the results, etc. This does not in general  
182 validate the method, but at least provides a basic check. In our case, we propose to check for the integrity of the data and for the  
183 results of some key processing.

## 184 **3.2 Think globally: from education to community standards**

### 185 **3.2.1 Training the new generation of scientists to digital tools and practices**

186 Unlike theoretical and academic courses and projects, software testing systems are well developed in industry since software  
187 quality is not the priority in Academia [32]. For a student, discovering and learning this core system of reproducibility, possibly  
188 during an internship in cooperation with industry, is a great opportunity for her/his future. Furthermore, as Internet applications in  
189 science are growing, networks of scientists and developers are forming and provide learning opportunities on the development  
190 practices. For instance, software developers have recently adopted “agile” practices and fast prototyping, test based development,  
191 etc. Some of these ideas and practices can —and should— be adapted to scientific software development.

192 The training in coding is still too limited for biologists. Often, it is self-training, from searching answers on Stack Overflow or  
193 equivalent. Despite efforts by organizations such as Software [33] or Data Carpentry [34] and the growing demand for ‘data  
194 scientists’ in life science, university training on coding practices is still not enough generalized. The difficulty to access and  
195 understand code may lead to applying code blindly without checking the validity of the results: often, scientists may prefer to  
196 believe that the results are correct because of the time that would be needed to check the validity of the results. Mastering a  
197 package such that results are truly understood can take a long time, as it was the case in our experiment.

198 Academia could instruct young scientists best practices for reproducibility. For instance, Hothorn and Leisch organized a  
199 reproducibility workshop gathering mostly PhD students and young postdocs specialized in bioinformatics and biostatistics. Then  
200 they evaluated 100 random sample papers from *Bioinformatics* [5]. Their study revealed how such a workshop can raise young

201 scientists awareness about “*what makes reproduction easy or hard at first hand*”. Indeed, they found out that only a third of the  
202 original papers and two-thirds for applications notes had given access to the source code of software used.

### 1 3.2.2 Standard consensus dataset and workflow system

204 4 We propose here that bioinformatics methods publications are systematically accompanied with a test dataset, code source and  
205 6 some basic tests. As the method is tested on new datasets, the number of tests of the method would increase in number and cover a  
206 8 wider range of applications. We give a first example with our NBS re-implementation. We develop below how this could  
207 10 generalize and what would be the benefit for the scientific community. In a sense, we propose to use the software development  
208 12 test framework idea but apply it to the scientific context.

209 14 A schematic overview of workflow system is shown in Fig 4. The core of this system would be a standard consensus dataset used  
210 16 to validate methods. For instance in the field of machine learning, standard image databases are widely used for training and  
211 18 testing (e.g. MNIST for handwritten digits [35]). In the case of our proposal, data could be classified in general categories such as  
212 20 binary, text, image (A, B, C in Fig 4 b), and with sub-categories to introduce criteria such as size, quantitative/qualitative,  
213 22 discrete/continuous using a tagging system (e.g. A-2, B-1, C-5 in Fig 4 b). Dataset could be issued from simulations or from  
214 24 acquisition, and would validate a method on a particular component. This workflow system will help scientists that cannot release  
215 26 their data because of privacy issues (Fig 4 a.1) (although these can often be overcome) but also give access to data and tests to a  
216 28 wide community. Scientists can use only standard data at the beginning of the project. And if there is no appropriate data, they  
217 30 have to suggest a new standard data.

218 32 Roughly, we divide those who interact with scientific software or analysis code in two categories. First, the authors (“A”) who  
219 34 propose a method and need to verify its validity and usefulness with public and/or their own – often private – data. Second, the  
220 36 users (“U”, e.g. developers, engineers, bioinformaticians) who need to test and evaluate the proposed methods with other data.

221 38 When authors launch a research about a method, this method must belong to a general category of methods (e.g. classification,  
222 40 regression) and could have a reproducibility profile, which will progressively be built by authors and users (Fig 4 b.3, b.4). Even  
223 42 the information of which method does or does not work with a standard data is a crucial information for future work. During  
224 44 optimization of project, the programming code with guide should be accessible although authors do not publish. To achieve  
225 46 current work, they can also post on preprint servers such as bioRxiv [36,37] associated with a GitHub repository by digital object  
226 48 identifiers (DOI).

227 50 Furthermore, users who test and approve reproducibility on original or new data could be credited and recognized by the scientific  
228 52 and developer communities (i.e. Stack Overflow, GitHub). This workflow system thus could facilitate the gathering of diverse  
229 54 users of the science community.

## 4 Conclusion and perspective

Across the scientific fields, the reproducibility issue is seen as a growing concern. Before reusing a published method, we attempted to reproduce the initial results and recoded the method to have a deep understanding of it. The investment in time to verify a previously published method can be more important than the work needed to publish a new paper. Despite the willingness of the authors to share their tool and help us in our work, we have faced computational reproducibility and robustness problems due to compatibility between environments, programming languages and software versions, choice of parameters, etc. In addition to individual effort to write well documented and readable code, we recommend to use online repositories and tools to help other scientists in their exploration of the method: Docker for environment standardization, GitHub for code version management, and Jupyter notebooks for demonstration and tutorial [20,21,24]. Scientists are strongly encouraged to adopt such practices, not only for writing code but also manuscripts [4]. At the community level, we should enhance the cooperation between academic education and industry to foster a new generation of well-trained scientists in software development. For instance, Academia-Industry Software Quality & Testing summit (AISTQ) has organised conference in order to encourage collaboration between Academia and Industry [38]. This is also in line with the work of the Software or Data carpentry organization [33,34]. Here, we propose a workflow system where the community uses standard datasets to validate tools. The proposed method success on data profile will be evaluated continuously with new datasets. Eventually, data and software can be versioned and cited to give credit to the individuals who have contributed to these building blocks of Science. This workflow is not merely a reproducibility validation tool, it is an attempt to make research product more reusable by the community using online platforms and open source tools, beyond the publication of a PDF file. Such system could be seen as a generalisation of already existing workflow systems such as Galaxy or GATK, integrating data provenance [39,40]. Some top-down initiatives already provide some incentives for such a process i.e. Horizon 2020 (H2020) [41] project of the European Commission (EC) mandates open access of research data, while respecting security and liability. H2020 supports OpenAIRE [42], a technical infrastructure of the open access, which allows the interconnection between projects, publications, datasets, and author information across Europe. Thanks to common guidelines, OpenAIRE interoperates with other web-based *generalist* scientific data repositories such as Zenodo, hosted by CERN, which allows combining data and GitHub repository using DOI. The Open Science Framework also hosts data and software for a given project [43]. Respecting standard guidelines to transparently communicate the scientific work is a key step towards tackling irreproducibility and insures a robust scientific endeavor.

### Key points

- Main barrier for reproducibility is in the lack of compatibility between environments, programming languages, software versions, etc.

- 259 • At the individual level, the key is in research practices such as proper code and data documentation and exploitation of  
260 online repositories and collaborative tools.
- 261 1 • At the community level, we propose a workflow system where standard consensus datasets are used to validate new  
262 2 methods and foster their generalizability.  
263 3  
264 4  
265 5  
266 6

## 263 7 **Declarations**

264 8  
265 9

### 264 10 • **Ethics approval and consent to participate**

265 11 We used the uterine endometrial carcinoma data as they were downloaded on January 1<sup>st</sup>, 2013 from the The Cancer Genome  
266 12 Atlas (TCGA) portal by Hofree and colleagues [1].  
267 13  
268 14  
269 15  
270 16  
271 17

### 267 18 • **Consent for publication**

268 19 Not applicable  
269 20  
270 21  
271 22

### 269 23 • **Availability of data and material**

270 24 Last version of StratiPy (Python) with two examples of reproducibility and dataset are available at GitHub [2].  
271 25  
272 26  
273 27  
274 28  
275 29  
276 30  
277 31  
278 32

271 27 Zenodo DOI: <https://doi.org/10.5281/zenodo.1042546>  
272 28  
273 29  
274 30  
275 31  
276 32

### 272 31 • **Competing interests**

273 33 The authors declare that they have no competing interests.  
274 34  
275 35  
276 36  
277 37  
278 38  
279 39  
280 40  
281 41  
282 42  
283 43  
284 44  
285 45  
286 46  
287 47  
288 48  
289 49  
290 50  
291 51  
292 52  
293 53  
294 54  
295 55  
296 56  
297 57  
298 58  
299 59  
300 60  
301 61  
302 62  
303 63  
304 64  
305 65

### 274 36 • **Funding**

275 38 This work was supported by:  
276 39  
277 40  
278 41  
279 42  
280 43  
281 44  
282 45  
283 46  
284 47  
285 48  
286 49  
287 50  
288 51  
289 52  
290 53  
291 54  
292 55  
293 56  
294 57  
295 58  
296 59  
297 60  
298 61  
299 62  
300 63  
301 64  
302 65

276 40 ○ Institut Pasteur (<http://dx.doi.org/10.13039/501100003762>)

277 42 ○ H2020 Societal Challenges (<http://dx.doi.org/10.13039/100010676>)

278 44 ○ Centre National de la Recherche Scientifique (<http://dx.doi.org/10.13039/501100004794>)

279 46 ○ Université Paris Diderot (<http://dx.doi.org/10.13039/501100005736>)

280 48 ○ Conny-Maeva Charitable Foundation

281 50 ○ Cognacq-Jay Foundation

282 52 ○ Orange (<http://dx.doi.org/10.13039/501100003951>)

283 54 ○ Fondation pour la Recherche Médicale (<http://dx.doi.org/10.13039/501100002915>)

284 56 ○ GenMed Labex

285 58 ○ BioPsy Labex.

286 • **Authors' contributions**

287 Y-M. K., J-B. P., and G.D. wrote the manuscript, Y-M. K. and G.D. developed the StratiPy module.

288 1 All authors read and approved the final manuscript.  
2  
3

289 4 • **Acknowledgements**  
5

290 6 We thank Thomas Rolland and Freddy Cliquet for sharing their advices and comments.  
7  
8

291 9 • **Authors' information**  
10

292 11 **Yang-Min KIM**<sup>1,2,3,4,\*</sup> is a PhD student at Human Genetics and Cognitive Functions unit at the neuroscience department of the  
293 12 Institut Pasteur in Paris. Her research on next-generation sequencing data and biological networks is focused on stratification of  
294 13 patients with Autism.  
295 14  
296 15

297 16 *Keywords:* Autism Spectrum Disorder; Network; Protein-Protein Interaction; Personalize Medicine; Network-Based Stratification;  
298 17  
299 18 Computational Biology.  
300 19  
301 20

302 21 **Jean-Baptiste Poline**<sup>5,6</sup> is is a researcher at Henry H. Wheeler Jr. Brain Imaging Center, Helen Wills Neuroscience Institute,  
303 22 University of California, Berkeley, California, USA. His research focuses on neuroimaging methods, imaging-genetic biostatistics  
304 23 and neuroinformatics.  
305 24  
306 25

307 26 *Keywords:* Neuroinformatics; Statistical methods; Brain imaging; Imaging genomics.  
308 27  
309 28

310 29 **Guillaume Dumas**<sup>1,2,3,4</sup> is research fellow of the Human Genetics and Cognitive Functions unit at the neuroscience department of  
311 30 the Institut Pasteur in Paris. His interdisciplinary work is at the cross-road of social psychology, cognitive neuroscience, and  
312 31 system biology.  
313 32  
314 33

315 34 *Keywords:* Open Science; Complex Systems; Computational Biology; Cognitive Science; Social Neuroscience; Autism Spectrum  
316 35 Disorder.  
317 36  
318 37

319 38 **Reference**  
320 39  
321 40

322 41 1. Hofree M, Shen JP, Carter H, Gross A, Ideker T. Network-based stratification of tumor mutations. Nat. Methods [Internet].  
323 42 2013 [cited 2015 Aug 12];10. Available from: <http://www.ncbi.nlm.nih.gov/pmc/articles/PMC3866081/>  
324 43  
325 44 2. StratiPy: Graph regularized nonnegative matrix factorization (GNMF) in Python [Internet]. GHFC; 2017. Available from:  
326 45 <https://github.com/GHFC/StratiPy>  
327 46  
328 47 3. Baker M. 1,500 scientists lift the lid on reproducibility. Nat. News. 2016;533:452.  
329 48  
330 49 4. Wilson G, Bryan J, Cranston K, Kitzes J, Nederbragt L, Teal TK. Good enough practices in scientific computing. PLOS  
331 50 Comput. Biol. 2017;13:e1005510.  
332 51  
333 52  
334 53  
335 54  
336 55  
337 56  
338 57  
339 58  
340 59  
341 60  
342 61  
343 62  
344 63  
345 64  
346 65

- 317 5. Hothorn T, Leisch F. Case studies in reproducibility. *Brief. Bioinform.* 2011;12:288–300.
- 318 6. Shapin S, Schaffer S. *Leviathan and the Air-Pump: Hobbes, Boyle, and the Experimental Life (New in Paper)*. Princeton  
319 University Press; 2011.
- 1  
320 2 7. Peng RD. Reproducible research in computational science. *Science.* 2011;334:1226–7.  
3
- 321 4 8. Whitaker K. Showing your working: a how to guide to reproducible research [Internet]. 2017. Available from:  
322 5 [https://figshare.com/articles/Showing\\_your\\_working\\_a\\_how\\_to\\_guide\\_to\\_reproducible\\_research/5443201](https://figshare.com/articles/Showing_your_working_a_how_to_guide_to_reproducible_research/5443201)  
6
- 323 7 9. Nekrutenko A, Taylor J. Next-generation sequencing data interpretation: enhancing reproducibility and accessibility. *Nat. Rev.*  
324 8 *Genet.* 2012;13:667–72.  
9
- 32510 10. Herndon T, Ash M, Pollin R. Does high public debt consistently stifle economic growth? A critique of Reinhart and Rogoff.  
32611 *Camb. J. Econ.* 2014;38:257–79.  
12
- 32713 11. Bourgeron T. From the genetic architecture to synaptic plasticity in autism spectrum disorder. *Nat. Rev. Neurosci.*  
32814 2015;16:551–63.  
15
- 32916 12. Loth E, Spooren W, Ham LM, Isaac MB, Auriche-Benichou C, Banaschewski T, et al. Identification and validation of  
33017 biomarkers for autism spectrum disorders. *Nat. Rev. Drug Discov.* 2016;15:70–73.  
18
- 33119 13. Introducing MEX Files - MATLAB & Simulink - MathWorks France [Internet]. [cited 2017 Aug 18]. Available from:  
33220 [https://fr.mathworks.com/help/matlab/matlab\\_external/introducing-mex-files.html?requestedDomain=www.mathworks.com](https://fr.mathworks.com/help/matlab/matlab_external/introducing-mex-files.html?requestedDomain=www.mathworks.com)  
21
- 33322 14. Tursa. MTIMESX - Fast Matrix Multiply with Multi-Dimensional Support - File Exchange - MATLAB Central [Internet].  
33423 2009 [cited 2017 Apr 24]. Available from: [http://fr.mathworks.com/matlabcentral/fileexchange/25977-mtimesx-fast-matrix-](http://fr.mathworks.com/matlabcentral/fileexchange/25977-mtimesx-fast-matrix-multiply-with-multi-dimensional-support)  
33524 [multiply-with-multi-dimensional-support](http://fr.mathworks.com/matlabcentral/fileexchange/25977-mtimesx-fast-matrix-multiply-with-multi-dimensional-support)  
25
- 33626 15. tim.lewis. Specifications [Internet]. OpenMP. [cited 2017 Aug 18]. Available from: <http://www.openmp.org/specifications/>  
27
- 33728 16. Python Software Foundation. History and License — Python 3.6.1 documentation [Internet]. 2017 [cited 2017 Apr 24].  
33829 Available from: <https://docs.python.org/3/license.html#licenses-and-acknowledgements-for-incorporated-software>  
30
- 33931 17. TCGA [Internet]. Cancer Genome Atlas - Natl. Cancer Inst. [cited 2017 Apr 24]. Available from:  
34032 <https://cancergenome.nih.gov/>  
33
- 34135 18. Eads. Hierarchical clustering (scipy.cluster.hierarchy) — SciPy v0.19.0 Reference Guide [Internet]. 2007 [cited 2017 Apr 24].  
34236 Available from: <https://docs.scipy.org/doc/scipy/reference/cluster.hierarchy.html>  
37
- 34338 19. Hierarchical Clustering - MATLAB & Simulink - MathWorks France [Internet]. [cited 2017 Apr 24]. Available from:  
34439 <https://fr.mathworks.com/help/stats/hierarchical-clustering-12.html>  
40
- 34541 20. A gallery of interesting Jupyter Notebooks · jupyter/jupyter Wiki [Internet]. [cited 2017 Aug 18]. Available from:  
34642 <https://github.com/jupyter/jupyter/wiki/A-gallery-of-interesting-Jupyter-Notebooks>  
43
- 34744 21. Blischak JD, Davenport ER, Wilson G. A Quick Introduction to Version Control with Git and GitHub. *PLoS Comput Biol.*  
34845 2016;12:e1004668.  
46
- 34947 22. Wilson G, Aruliah DA, Brown CT, Chue Hong NP, Davis M, Guy RT, et al. Best Practices for Scientific Computing. Eisen  
35048 JA, editor. *PLoS Biol.* 2014;12:e1001745.  
49
- 35150 23. Sandve GK, Nekrutenko A, Taylor J, Hovig E. Ten Simple Rules for Reproducible Computational Research. Bourne PE,  
35251 editor. *PLoS Comput. Biol.* 2013;9:e1003285-4.  
52
- 35353 24. Boettiger C. An introduction to Docker for reproducible research, with examples from the R environment. *ACM SIGOPS*  
35454 *Oper. Syst. Rev.* 2015;49:71–9.  
55
- 35556 25. Introduction [Internet]. Vagrant HashiCorp. [cited 2017 Oct 13]. Available from: <https://www.vagrantup.com/intro/index.html>  
57
- 35658 26. Singularity | Singularity [Internet]. [cited 2017 Oct 13]. Available from: <http://singularity.lbl.gov/>  
59  
60  
61  
62  
63  
64  
65

357 27. Kurtzer GM, Sochat V, Bauer MW. Singularity: Scientific containers for mobility of compute. PLOS ONE.  
358 2017;12:e0177459.

359 28. Stodden V, McNutt M, Bailey DH, Deelman E, Gil Y, Hanson B, et al. Enhancing reproducibility for computational methods.  
360 1 Science. 2016;354:1240–1.  
361 2

361 3 29. Hill SL. How do we know what we know? Discovering neuroscience data sets through minimal metadata. Nat. Rev. Neurosci.  
362 4 2016;17:735–6.  
363 5

363 6 30. PEP 8 -- Style Guide for Python Code [Internet]. Python.org. [cited 2017 Aug 21]. Available from:  
364 7 <https://www.python.org/dev/peps/pep-0008/>  
365 8

365 9 31. PEP 257 -- Docstring Conventions [Internet]. Python.org. [cited 2017 Aug 21]. Available from:  
366 10 <https://www.python.org/dev/peps/pep-0257/>  
367 11

367 12 32. Jasny BR, Wigginton N, McNutt M, Bubela T, Buck S, Cook-Deegan R, et al. Fostering reproducibility in industry-academia  
368 13 research. Science. 2017;357:759–61.  
369 14

369 15 33. Software Carpentry [Internet]. Softw. Carpentry. [cited 2017 Aug 22]. Available from: [http://software-](http://software-carpentry.org/index.html)  
370 16 [carpentry.org/index.html](http://software-carpentry.org/index.html)  
371 17

371 18 34. Data Carpentry [Internet]. Data Carpentry. [cited 2017 Aug 22]. Available from: <http://www.datacarpentry.org/>  
372 19

372 20 35. MNIST handwritten digit database, Yann LeCun, Corinna Cortes and Chris Burges [Internet]. [cited 2017 Aug 23]. Available  
373 21 from: <http://yann.lecun.com/exdb/mnist/>  
374 22

374 23 36. Bourne PE, Polka JK, Vale RD, Kiley R. Ten simple rules to consider regarding preprint submission. PLOS Comput. Biol.  
375 24 2017;13:e1005473.  
376 25

376 26 37. Preprints in biology. Nat. Methods. 2016;13:277–277.  
377 27

377 28 38. Academia – Industry Software Quality & Testing summit - ISTQB® International Software Testing Qualifications Board  
378 29 [Internet]. [cited 2017 Aug 23]. Available from: [http://www.istqb.org/special-initiatives/istqb-conference-network-2istqb-](http://www.istqb.org/special-initiatives/istqb-conference-network-2istqb-conference-network-academia/academia-%E2%80%93-industry-software-quality-testing-summit.html)  
379 30 [conference-network-academia/academia-%E2%80%93-industry-software-quality-testing-summit.html](http://www.istqb.org/special-initiatives/istqb-conference-network-2istqb-conference-network-academia/academia-%E2%80%93-industry-software-quality-testing-summit.html)  
380 31

380 32 39. Kanwal S, Khan FZ, Lonie A, Sinnott RO. Investigating reproducibility and tracking provenance – A genomic workflow case  
381 33 study. BMC Bioinformatics. 2017;18:337.  
382 34

382 35 40. Karim MR, Michel A, Zappa A, Baranov P, Sahay R, Rebholz-Schuhmann D. Improving data workflow systems with cloud  
383 36 services and use of open data for bioinformatics research. Brief. Bioinform. [Internet]. [cited 2017 Jul 31]; Available from:  
384 37 <https://academic.oup.com/bib/article/doi/10.1093/bib/bbx039/3737318/Improving-data-workflow-systems-with-cloud>  
385 38

385 39 41. Open Research Data in Horizon 2020 [Internet]. [cited 2017 Aug 23]. Available from:  
386 40 [https://ec.europa.eu/research/press/2016/pdf/opendata-infographic\\_072016.pdf](https://ec.europa.eu/research/press/2016/pdf/opendata-infographic_072016.pdf)  
387 41

387 42 42. Open Access in Horizon 2020 - EC funded projects [Internet]. [cited 2017 Aug 23]. Available from:  
388 43 <https://www.openaire.eu/edocman?id=749&task=document.viewdoc>  
389 44

389 45 43. Foster ED, Deardorff A. Open Science Framework (OSF). J. Med. Libr. Assoc. JMLA. 2017;105:203–6.  
390 46  
391 47  
392 48  
393 49  
394 50  
395 51

## 391 52 **Figure legends**

392 54 **Figure 1: Hidden reproducibility issues like underwater iceberg.** Scientific journals readers have the impression that they can  
393 55 almost see the full work of method. But in reality, articles do not take into account adjustment and configuration for significant  
394 56  
395 57



394 replication in most cases. Therefore, there is a significant gap between apparent executable work (i.e. above water portion of  
395 iceberg) and necessary effort in practice (i.e. full iceberg).

396 1  
397 2 **Figure 2: Analogy between robustness issues and road transport.** The aim is to achieve same output (i.e. to reach the same  
398 3 location) using published methods (i.e. engine). Despite the same input data (i.e. gasoline), we obtained different results due to  
399 4 different programming languages —e.g. MATLAB and Python— (i.e. different roadways) and environments (i.e. different  
400 5 vehicles).

401 6  
402 7 **Figure 3: Normalized confusion matrices between original and replicated results.** Before (a) and after (b) applying  
403 8 appropriate value of graph regularization factor on NBS method. Each row or column corresponds to a subgroup of patients (here  
404 9 three subgroups). The diagonal elements show the frequency of correct classifications for each subgroup: a high value indicates a  
405 10 correct prediction.

406 11  
407 12 **Figure 4: Working principles of Workflow system with private data.** Figure 4a shows a classical workflow: (a.1) Authors  
408 13 (“A”) take private data; (a.2) Authors publish their method and corresponding outputs/results; (a.3) Users (“U”) having their own  
409 14 data find a relevant paper but will be lost in the labyrinth of reproducibility. Figure 4b shows workflow with standard consensus  
410 15 dataset: (b.1) If authors work with their own data, they must identify corresponding standard data tag(s) (e.g. A-2); (b.2) Users  
411 16 choose a method category (e.g. "Classification"); (b.3) Reproducibility profile with standard data is progressively built with  
412 17 method upgrade throughout publication of the first version. Color corresponds to method category depending score and bar length  
413 18 corresponds to progression of replication test; (b.4) Users can test proposed method with other data standards and thus participate  
414 19 to enhancement of the reproducibility profile; (b.5) Thanks to the collective work on testing, the method could be optimized and  
415 20 authors can upgrade their initial paper (versioning).

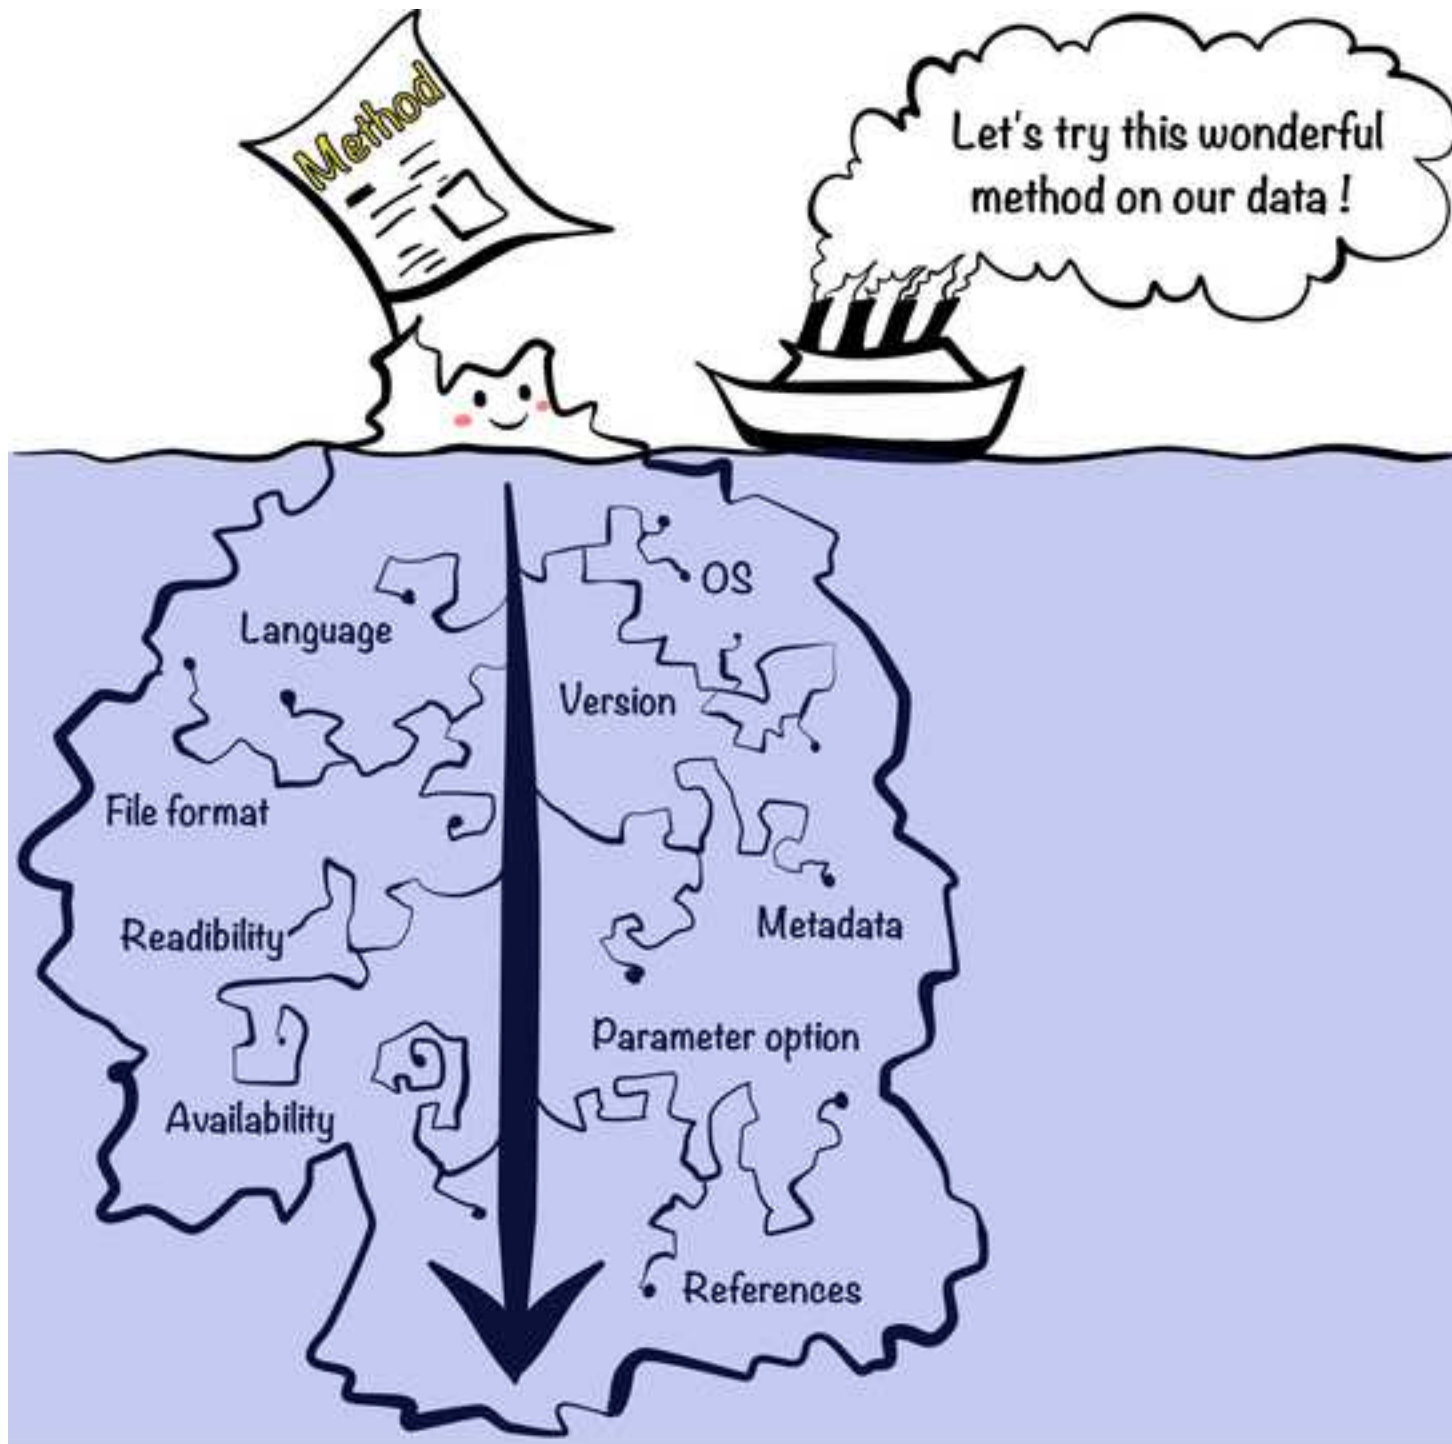

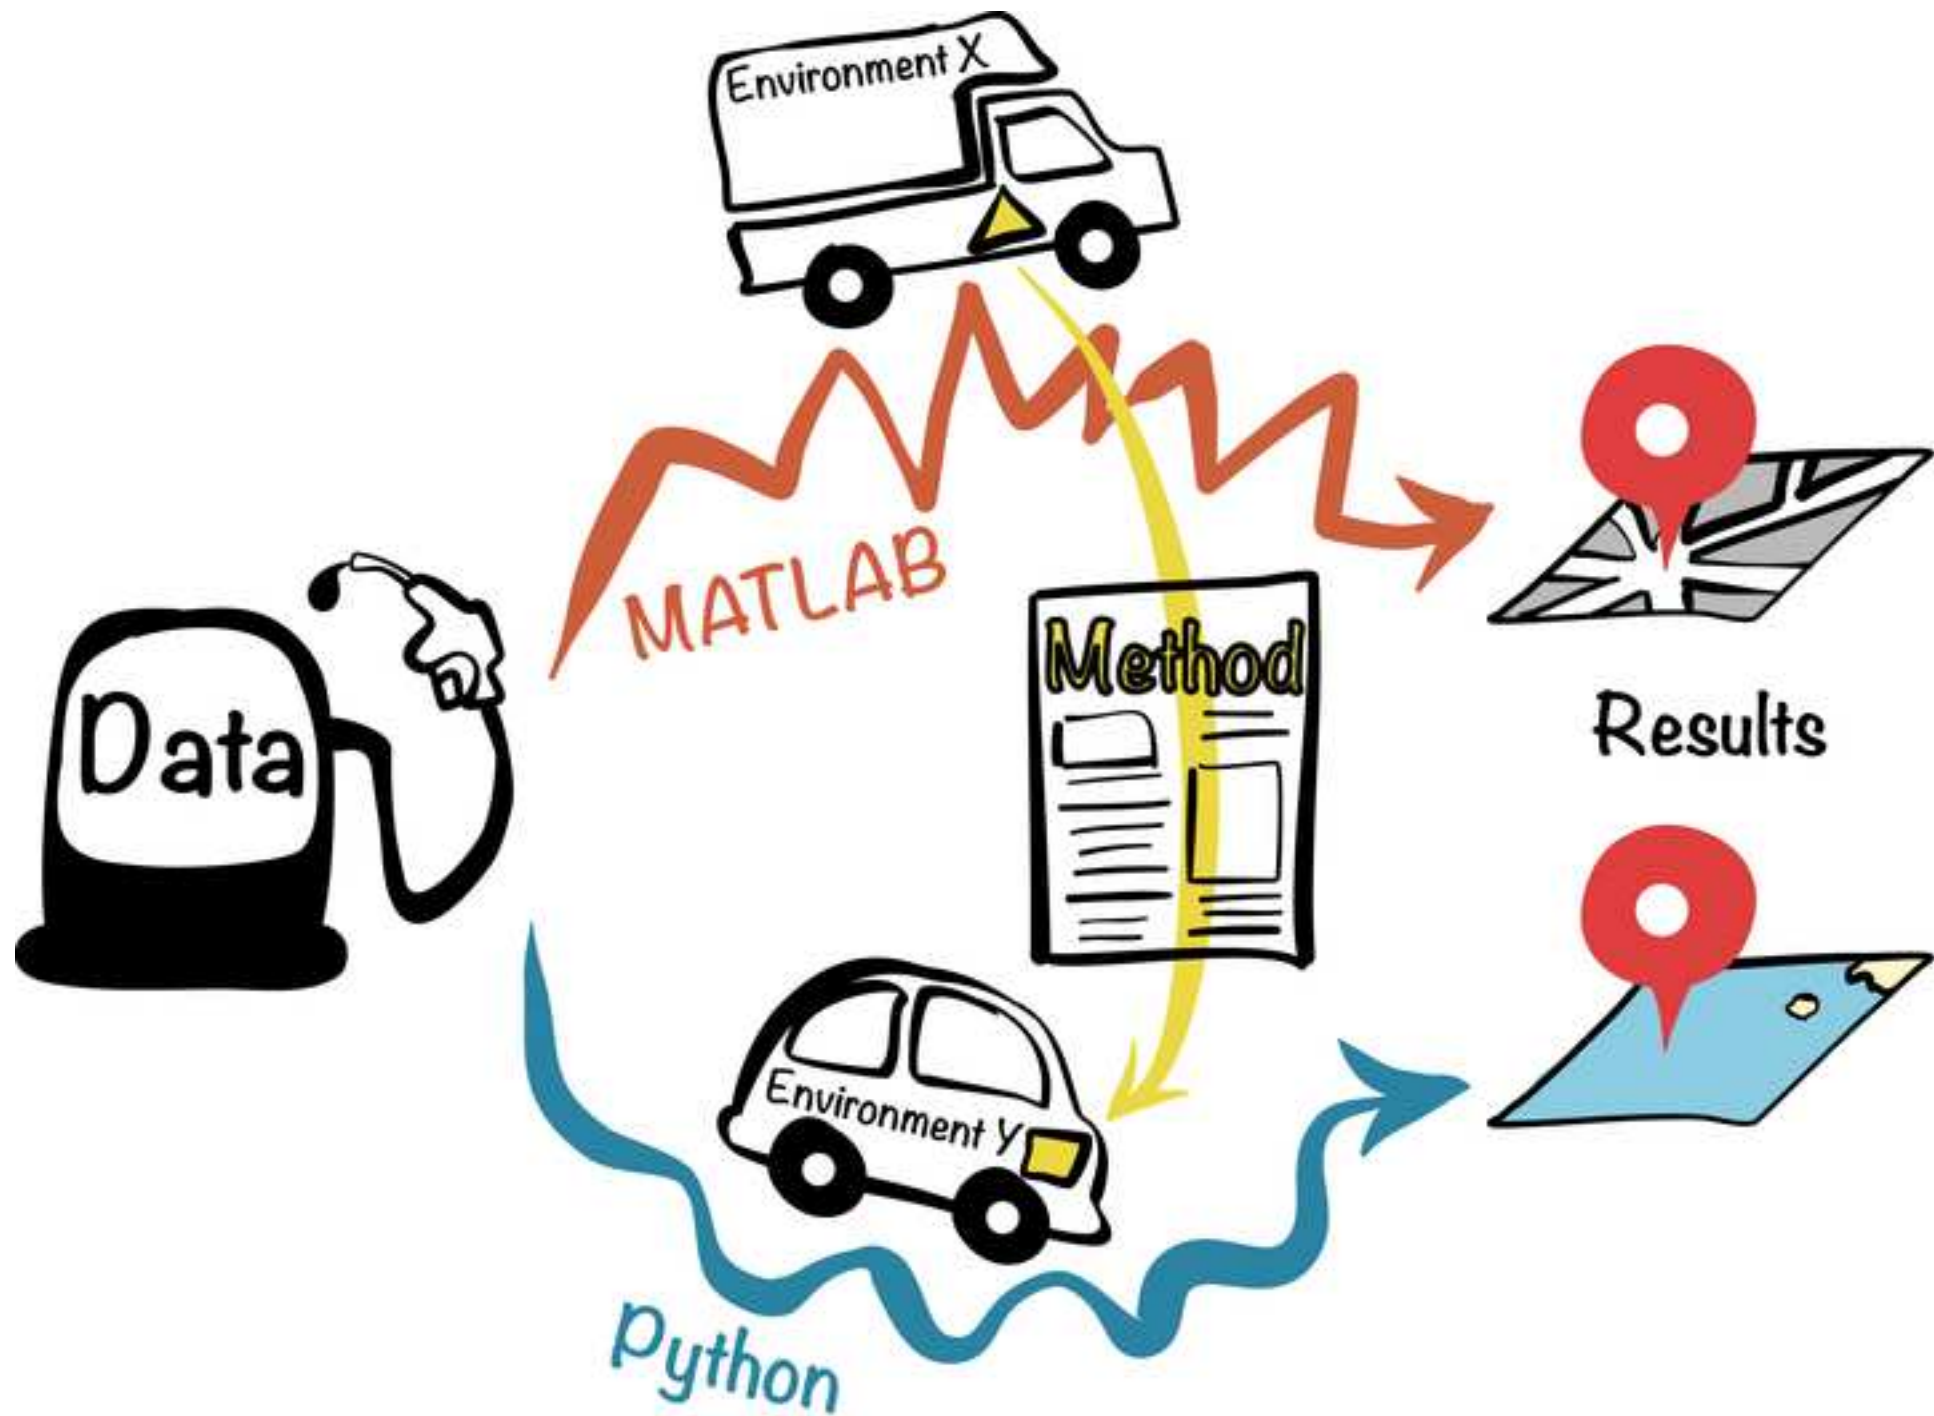

**a** Confusion matrix with reported tuning parameter value ( $\lambda = 1$ )

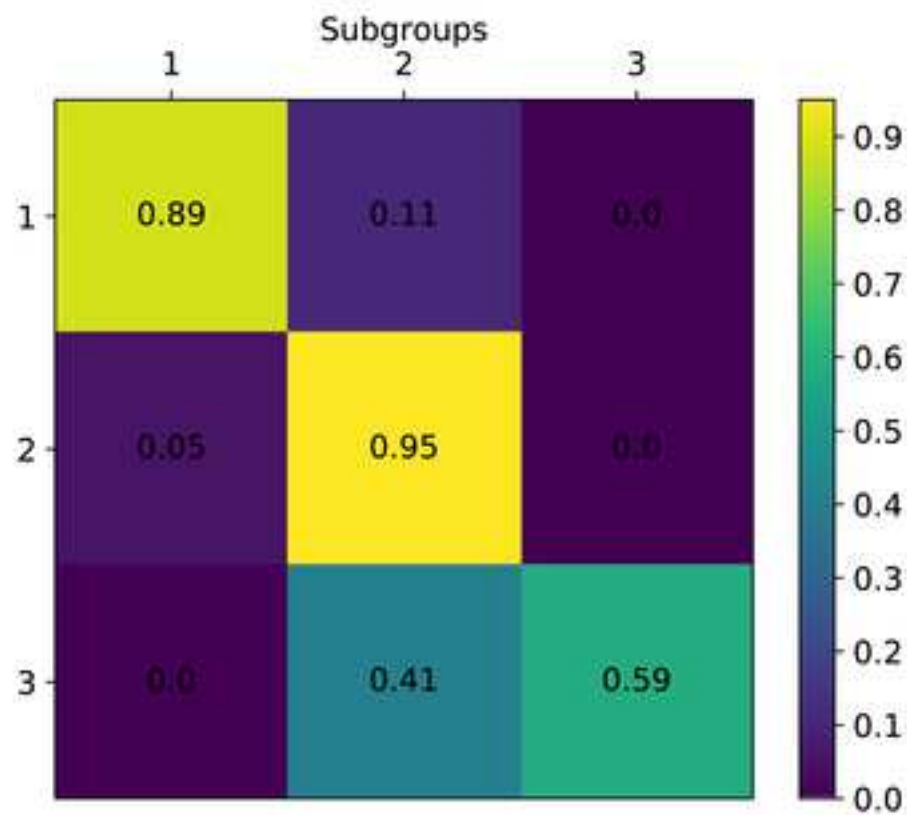

**b** Confusion matrix with actually used tuning parameter value ( $\lambda = 1800$ )

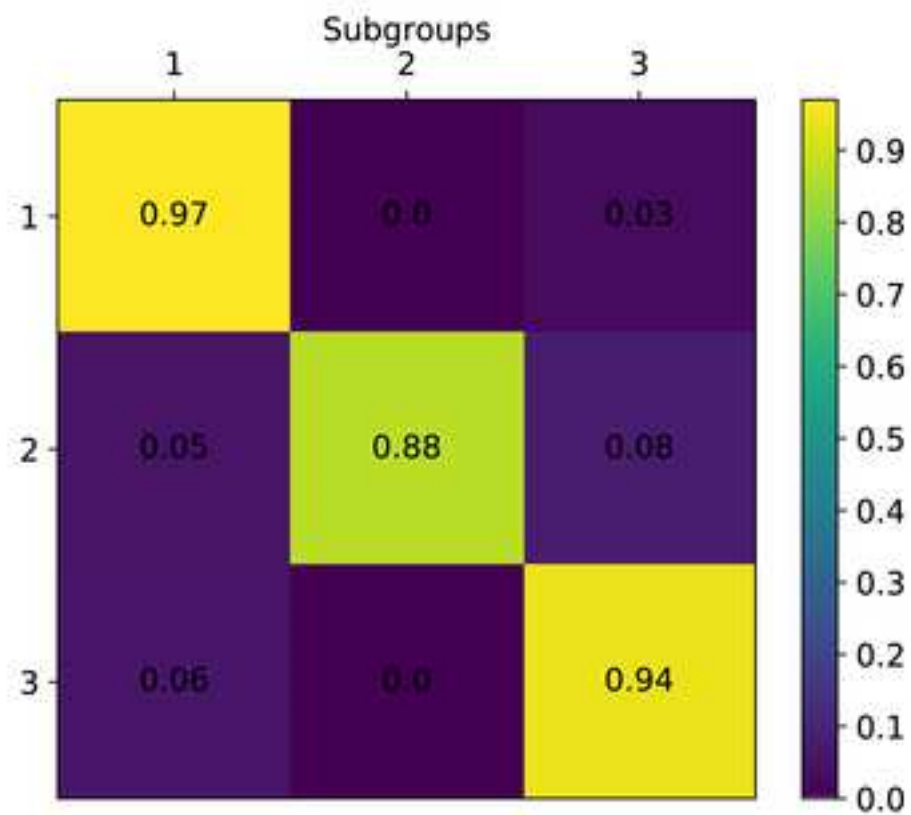



Paris, November 6, 2017

*Human Genetics and  
Cognitive Functions unit*

From : Yang-Min KIM

Phone: +33 1 40 61 36 54

Fax: +33 1 40 61 34 21

Email: yang-min.kim@pasteur.fr

Dear Editors,

Please find enclosed a copy of our manuscript entitled “**Experimenting with Reproducibility in Bioinformatics**” by Kim, Poline, and Dumas (bioRxiv 143503; doi: <https://doi.org/10.1101/143503>) that we would like to be considered for publication in *GigaScience*.

The main subject of our manuscript is, starting from a case study, to understand the possible causes of bioinformatic irreproducibility and to propose some practical solutions at both individual and collective levels.

One of our current research challenge is to classify patients with autism into more homogeneous subgroups using genetic stratification. Cancer research has recently proposed Network Based Stratification (NBS), to stratify tumours into meaningful subset (Hofree N. *et al* 2013). Reported original results should be reproducible by our team before applying NBS on our data. Despite original data and code were available, we faced several obstacles at several scales driven by different environments, programming languages (MATLAB and Python), or algorithm parameterization.

As the number of published increases every year, the capacity for the scientific community to check and reuse the results described in these article is not following this increase. The reproducibility crisis is now well described in many scientific fields and in particular in biology but the number of studies takling this issue remains very scarce in the literature. While reproducibility of results appears as the key for scientific progress, it is not yet generally considered as important as novelty.

In this experiment on reproducibility, we 1) attempt to reproduce initial results 2) attempt to estimate the robustness of our own results 3) extract lessons from these attempts, using a specific and concrete example. In addition, we propose to readers two options to reproduce the figure 3 using our NBS library (<https://github.com/GHFC/Stratipy>) with either a Jupyter Notebook or a Docker container. We argue that the bioinformatics community should collaborate with other communities and we propose a workflow system where standard datasets are used to validate tools continuously. We think that these observations and suggestions should be of interest to bioinformatics community and we hope to contribute to solutions to the so-called reproducibility crisis.

We certify that this manuscript has not been published elsewhere.  
We look forward to hearing from you.

Yang-Min KIM, on the behalf of all the authors.
